# Supplementary material for: Status of global coastal adaptation
Source: Springer Nature journal article supplement (doi:10.1038/s41558-023-01834-x), 2023-10-19
Supplement: MOESM2 [file 41558_2023_1834_MOESM2_ESM.xlsx]

## Sheet: List of data-sheets
Supplementary information to the paper: Status of global coastal adaptation
LIST OF DATA-SHEETS
In this Excel document
2	Method (questions and scores)
3	Number case studies (SI3a), and rescaling process for the archetypes (SI3b) and regions (SI3c)
4a	Synthesis SCORES (all archetypes, all regions)
4b	Synthesis ARCHETYPES (with rescaling)
4c	Synthesis REGIONS (with rescaling)
4d	Synthesis GLOBAL (all archetypes & regions, no rescaling)
4e	Synthesis CASE STUDIES (all archetypes & regions, no rescaling)
5a	Assessment archetype A1 (all regions)
5b	Assessment archetype A2 (all regions)
5c	Assessment archetype A3 (all regions)
5d	Assessment archetype A4 (all regions)
6a	Case study per aggregated scores, General category of score
6b	Case study aggregated scores (classified by region)
6c	Case study aggregated scores (classified by archetype)
6d	Assessment adaptation GAP

## Sheet: 2. Method (questions and scor
ASSESSMENT METHOD (question matrix and score descriptions)
GAP-Track_Expert judgment assessment grid _Methodological bases (questions framing and score description)
Adaptation Challenge considered: coastal adaptation
Some further guidance: - Guidance on scope and scale is included (italics) for each sub-question - NA (Not Assessed) applies when the experts are not able to score, e.g; because they don’t know is information is available. Score 0 applies when experts know that information doesn’t exist.
Guiding question	Sub-questions	Score description
1. Does scientifically-based knowledge on current and future climate risks exist at the appropriate scale?	1.1. Are current climate-related coastal hazards known? Scope: climate hazards from both extreme and slow onset events (e.g. storms and sea-level rise, respectively) that occur —and sometimes compound— at the coastal system and have direct impacts on this latter. Scale: primary focus on local-scale knowledge, but can also include information at a larger scale if current impact/risk generating pro…	Dimensions considered: level of information on climate hazards at the case study scale; potential for lessons to be learnt for other case studies. NA = Not assessed. 0 = No information exists on current climate coastal hazards at the case study scale. 1 = Very limited knowledge at the case study scale, e.g. only partial information on only one of the main climate hazards occurring locally. Knowle…
	1.2. Are current drivers of exposure and vulnerability of natural systems known? Scope: drivers influencing the dynamics of key natural coastal systems (beach-dune systems, wetlands, coral reefs, coastal vegetation, etc.) Scale: primary focus on local-scale knowledge, but can also include information at a larger scale, i.e. at the local region if the ecosystem develops beyond the study area (e.g.…	Dimensions considered: level of information on risk drivers at the case study scale; potential for lessons to be learnt for other case studies. NA = Not assessed. 0 = No information at the case study scale on the drivers of natural systems’ exposure and vulnerability to climate change. 1 = Partial knowledge on a limited number of drivers of climate-sensitive ecosystems’ exposure and vulnerability…
	1.3. Are current drivers of exposure and vulnerability of human systems known? Scope: drivers related to populations, assets (buildings, infrastructure, etc.) and economic activities (beachside tourism, fisheries, aquaculture, etc.) as well as decision-making processes (public authorities, local communities, private sector). Various processes are therefore considered such as, for example: in-/out…	Dimensions considered: level of information on risk drivers at the case study scale; potential for lessons to be learnt for other case studies. NA = Not assessed. 0 = No information at the case study scale on the drivers of human systems’ exposure and vulnerability to climate change. 1 = Partial knowledge on a limited number of settlements/sectors/communities (i.e. only partial coverage of the ca…
	1.4. Are future climate risks projected (at a relevant/useful scale)? Scope: touches on a forward-looking approach for Q1.1 + Q1.2 + Q1.3. Integration of knowledge on future trends in the same components as above (hazards, exposure and vulnerability for both natural and human systems), and based on scenario-based prospective approaches using modeling and other methods (e.g. expert judgment). Idea…	Dimensions considered: projections available; scenarios considered; potential for lessons to be learnt for other case studies. NA = Not assessed. 0 = No projections available at an adequate scale (e.g. only global or regional information). 1 = Projections exist at the case study scale but only for a single warming scenario and a business-as-usual socio-economic scenario. Adaptation scenarios are …
2. Are there adaptation-related plans in place and implemented locally?	2.1 Are there adaptation-related planning tools having concrete implications locally? Scope: local governments are considered playing a more prominent role than national governments in making adaptation happen on the ground. As a result, only planning instruments that have concrete and direct implications on local scale risk reduction policies are considered. That includes plans and policies spec…	Dimensions considered: existence of local plan; existence of a plan or regulations at the national level that effectively support implementation on the ground). NA = Not assessed. 0 = No local plan addresses coastal risk reduction or coastal adaptation. 1 = A local policy exists that covers a wide diversity of settlements/sectors/communities at the case study scale, but only consists of a list of…
	2.2. Are locally-relevant adaptation plans implemented? Scope: Level of implementation at the local level of adaptation-related planning instruments. Implicitly includes dimensions of governance and multi-level coordination. Includes processes for monitoring and evaluation. Scale: primary focus on local-scale instruments. Larger-scale (national or local region) planning tools and regulations are …	Dimensions considered: level of implementation of the local plan(s) (from no to full implementation); existence of a monitoring and evaluation system. N.B.: in line with Q2 framing, Q2.2 does not assess national adaptation planning, but what is actually happening at the local scale. As a result, the implementation of a national or regional plan is not considered here. NA = Not assessed. 0 = No im…
	2.3. Are the main non-state actors contributing to the design and implementation of locally-relevant local plans/policies? Scope: considers the extent to which non-state actors (private sector, communities, NGOs, etc.) are involved in consultations or drafting of local-level coastal adaptation strategies. Multiple processes are considered, including participation processes to involve local commun…	Dimensions considered: existence of involvement/participatory processes at the local scale. NA = Not assessed. 0 = No participation processes are reported. 1 = Participation is very limited, e.g. to few people from a specific sector or community in a specific place, but not at the whole case study scale. A national-level participatory process may exist, but a priori does not involve people or sta…
3. Are adequate actions taking place at a relevant scale to reduce coastal climate risks?	3.1 Are there actions targeting prominent climate hazards? Scope: actions that address the main climate-related hazards identified in Q1 scoping (i.e. erosion, marine flooding, inland flooding, salinization, etc.). All types of adaptation-related actions are considered, e.g. nature-based and community-based adaptation activities aimed at directly limiting climate hazards (e.g. through enhanced ec…	Dimensions considered: types of hazards and types of actions (coastal protection, accommodation, retreat) depending on context-specificities, induced risk of maladaptation NA = Not assessed. 0 = No specific action is undertaken to control hazards at the coast. 1 = A very limited number of actions are reported on the ground, without any insight on their potential to reduce risk or generate maladap…
	3.2. Are there actions addressing the main drivers of coastal natural systems’ exposure & vulnerability? Scope: actions addressing the most influential drivers of exposure and vulnerability of natural systems (e.g., mangrove clearing, coral and beach mining). Encompasses both measures to preserve or restore ecosystems and their services, and the existence of measures having detrimental effects on…	Dimensions considered: type of risk drivers and type of actions (preservation and restoration activities to enhance coastal ecosystems’ resilience to climate change, e.g. vegetation replanting, coral farming, etc.; as well as ecosystem services, e.g. provisional ecosystem services for water and food). N.B. Coastal protection ecosystem services are primarily considered in 3.1. Implemented measures…
	3.3. Are there actions addressing the main drivers of coastal human systems’ exposure & vulnerability? Scope: actions addressing the most influential drivers of exposure and vulnerability to people, tangible and intangible assets (e.g. buildings and infrastructure, livelihoods) and economic activities. The risk of maladaptive outcomes is also considered, as well as in Q5.1 and mainly in Q5.2. Sca…	Dimensions considered: activities reducing the exposure of the population, assets (tangible and intangible) and the economy (e.g. mainstreaming climate risk in design and maintenance activities), and enhancing societal adaptive capacity (e.g. risk awareness, equity in access to safe places and resources); risk of maladaptive outcomes NA = Not assessed. 0 = No response targets the underlying socio…
4. Are there sufficient cross-scale institutional, human and financial capacities to implement adaptation locally?	4.1. Are there governance arrangements in place to support institutional capacities to coordinate adaptation activities locally (multi-scale governance and mainstreaming across policy areas/sectoral plans)? Scope: the focus is on governance arrangements and institutional capacities to support implementation locally, not on plans and policy documents (captured in Q2.1). These governance arrangemen…	Dimensions considered: arrangements to ensure planning and implementation locally, but also institutional coordination across scales, and that benefit to the local scale (e.g., existence of an adaptation unit and its connection to other institutions) NA = Not assessed. 0 = No institutional arrangements are in place to address adaptation challenges. 1 = There are limited and scattered institutiona…
	4.2. Are there enough human capacities in place at the relevant scale (primarily locally, but also nationally)? Scope: the focus is on human means of implementation of policy instruments (e.g. plans) and actions that are available at the local case study level first; means available at other levels (in Ministries, for example) are also considered but in a more secondary way as they are most often…	Dimensions considered: number of people working on adaptation-related dimensions; level of training of these people on coastal risk management and adaptation; and consistency between needs (actions and decision-making processes; is there evidence of adaptation-compatible practices?). NA = Not assessed. 0 = No people dedicated to coastal risk management and climate adaptation. 1 = Very limited num…
	4.3. Is specific and sustainable funding available at the case study scale that is specifically dedicated to managing climate-related coastal risk and adaptation? Scope: This sub-question does not aim to assess whether available funding for adaptation is enough or not, but rather at describing the finance context for local coastal adaptation. Besides the amount of funding available, the main prob…	Dimensions considered: existence of a dedicated funding support; duration of such funding support. NA = Not assessed. 0 = No budget dedicated to coastal risks and adaptation exists at the case study scale. 1 = A budget exists at the case study scale that is a priori dedicated to coastal risks and adaptation, but it remains unclear in terms of amounts, uses and timeframes. 2 = A specific budget is…
5. Is there evidence on effective reduction of current and projected coastal climate risk (including reducing hazards locally and managing long-term exposure and vulnerability)?	5.1. Is there evidence of risk reduction today? Scope: understand the level of ground-rooted evidence showing to what extent policies and actions in place are actually contributing to reduce climate-related coastal impacts (observed) and risks (not yet realized) at the case study scale. Multiple sources of information can be considered: scientific or grey when they exist, but also the experts’ ow…	Dimension considered: the relationship between responses (policies, actions) implemented and measured reduction in climate risk levels; experts' own view/experience on risk reduction level at the case study scale (or from other cases presenting similar features). NA = Not assessed. 0 = No relationship is established (either because there is none, or because risk reduction is not assessed); and th…
	5.2. Are there indications that the policies and actions implemented at the case study scale contribute to minimize the risk of maladaptation in the long run? Scope: besides bringing evidence of actual (or even potential) risk reduction, there is a need to ensure that adaptation responses (policies and actions) are not contributing to increasing risk in the future, especially through increased ex…	Dimensions considered: level of evidence describing whether the strategy in place intends (e.g. has formal maladaptation targets) or actually do contributes (i.e. through risk reduction targets more broadly) to minimizing the risk of maladaptation NA = Not assessed. 0 = No indication, so that an insidious but substantial contribution to increasing coastal risk (maladaptation) cannot be excluded. …
	5.3. Are there indications that the society (at the case study scale) is aware of the need to tackle both current and future coastal climate risks? Scope: understand the extent to which the case study-level community/society including the civil society, private stakeholders, NGOs, etc., is (i) aware of the coastal adaptation challenge locally, and (ii) prepared to support adaptation-related respo…	Dimensions considered: current/future risk perception; knowledge on the drivers of climate risk (climate variability and change, environmental, anthropogenic); weather and climate risks at large (not only coastal). NA = Not assessed. 0 = No indication that the local society/community neither correctly perceives nor understands the challenges related to coastal risk reduction and adaptation. 1 = O…
6. Is a pathway-like approach considered?	6.1. Are locally-relevant adaptation goals established in the short-, medium- and long-term (respectively <10 years, 1-3 decades, more), and articulated with each other (i.e. how does reaching present-day goals support reaching longer-term ones)? Scope: understand the extent to which clear goals have been established at the case study scale on coastal risk reduction, against which timeframes, and…	Dimensions assessed: existence of a local-scale goal(s) considering climate risk; short- to long-term NA = Not assessed. 0 = No coastal risk-specific goal at the case study scale, and none at higher scales that are highly relevant for the case study. 1 = A general goal(s) exists at the case study scale level but remains vague in scope in terms of targets, sectors and scales; and in terms of consi…
	6.2. Are synergies and trade-offs (now and over time) between various adaptation-related options considered? Scope: understand the extent to which synergies and trade-offs between multiple adaptation responses (policies and actions) are studied (on scientific bases) and considered in local adaptation planning (i.e. to develop a roadmap(s) at multiple time-scales). Scale: primary focus on the loca…	Dimensions assessed: efforts to understand synergies and tradeoffs among a wide range of adaptation responses (actions and policies) NA = Not assessed. 0 = Synergies and trade-offs between different adaptation responses are neither known nor considered. 1 = Synergies and trade-offs are barely considered at the case study level (e.g. only for a very small set of options, and possibly only for very…
	6.3. Are options planned in a sequenced manner and alternative strategies at the case study level? Scope: understand the extent to which a roadmap(s) relying on a diversity of interventions sequenced over time is in place at the case study level, or is being under development, and that ideally considers multiple timeframes (short-, medium-, long-term). Scale: primary focus on the local case study…	Dimensions considered: level of multi-response planning NA = Not assessed. 0 = Responses are planned separately from each other. 1 = Responses are still mainly planned separately from each other, but emerging signs of the consideration of their synergies and trade-offs (e.g. only for a very small set of options in a very specific location). 2 = Early examples of strategies concretely bringing tog…

## Sheet: 3a,b,c. Number case studies +
NUMBER OF CASE STUDIES
SI3a. NUMBER OF CASES PER ARCHETYPES AND REGIONS
	Africa	America North	America Central & South	Asia	Australia & New Zealand	Europe	Small Islands
Archetype A1	3	2	2	2	2	4	4	19
Archetype A2	3	3	2	2	2	2	1	15
Archetype A3	2	3	3	2	2	3	2	17
Archetype A4	2	3	2	1	1	1	0	10
	10	11	9	7	7	10	7	61
	61
SI3b. RESCALING FOR ARCHETYPES (to allow comparing based on a harmonized number of cases) —> Material used in Data-Sheet “SI4b. Synthesis across archetypes (with rescaling)”
	Initial number of cases		Rescaled number of cases
	Number	% of the sample	Multiplying factor to align with a 10-case scale	Check consistency with the 10-case scale
Archetype A1	19	31.1475	0.526316	10
Archetype A2	15	24.5902	0.666667	10
Archetype A3	17	27.8689	0.588235	10
Archetype A4	10	16.3934	1	10
ALL ARCHETYPES	61	100	0.649936	40
SI3c. RESCALING FOR REGIONS (to allow comparing based on an harmonized number of cases) —> Material used in Data-Sheet “SI4c. Synthesis across regions (with rescaling)”
	Initial number of cases		Rescaled number of cases
	Number	% of the sample	Multiplying factor to align with a 10-case scale	Check consistency with the 10-case scale
Africa	10	16.3934	1	10
America North	11	18.0328	0.909091	10
America Central & South	9	14.7541	1.11111	10
Asia	7	11.4754	1.42857	10
Australia & New Zealand	7	11.4754	1.42857	10
Europe	10	16.3934	1	10
Small Islands	7	11.4754	1.42857	10
ALL REGIONS	61	100	1.14826	70

## Sheet: 4a. Synthesis SCORES (all arc
Synthesis SCORES and CONFIDENCE LEVELS (all case studies, archetypes and regions)
Assessment ROUNDS 1 and 2 (Oct. 2022, Jan. 2023)
GAP-Track_Expert judgment assessment grid _All regions_All experts
Adaptation Challenge considered: coastal adaptation
Some further guidance: - Guidance on scope and scale is included (italics) for each sub-question - NA (Not Assessed) applies when the experts are not able to score, e.g; because they don’t know is information is available. Score 0 applies when experts know that information doesn’t exist.		PER ARCHETYPE (across regions)															PER REGION (across archetypes)																					ARCHETYPES ACROSS REGIONS
Guiding questions		Median scores							Aggregated scores								Median scores (per region, across archetypes)										Aggregated scores (per region, across archetypes)												Median scores
		Archetype A1	Archetype A2	Archetype A3	Archetype A4	All archetypes			Archetype A1	Archetype A2	Archetype A3	Archetype A4	All archetypes				Africa	America North	America Central & South	Asia	Australia & New Zealand	Europe	Small islands	All regions			Africa	America North	America Central & South	Asia	Australia & New Zealand	Europe	Small islands	All archetypes					Africa	America North	America Central & South	Asia	Australia & New Zealand	Europe	Small Islands	All regions
SCORES													Aggregated score	%	%																			Aggregated score	%	%		SCORES
1. Does scientifically-based knowledge on current and future climate risks exist at the appropriate scale?	1.1. Are current climate-related coastal hazards known?	4	3	3	3	3	3		66	45	49	28	188	7.95262	29.0186		3	3	3	3	3	4	3	3	3		25	35	23	24	22	37	22	188	7.95262	29.0186		Archetype A1	2	3	2.5	2	3	4	2	2
	1.2. Are current drivers of exposure and vulnerability of natural systems known?	3	3	3	2.5	3			57	38	50	26	171	7.2335			2	4	3	3	3	4	3	3			18	35	22	23	20	31	22	171	7.2335			Archetype A2	2	3	2	2	3	3	1	2
	1.3. Are current drivers of exposure and vulnerability of human systems known?	3	3	3	2.5	3			62	46	46	25	179	7.57191			2	3	3	3	3	4	3	3			19	28	28	22	22	39	21	179	7.57191			Archetype A3	1	1	2	2	3	2	1	2
	1.4. Are future climate risks projected (at a relevant/useful scale)?	3	3	2	2	3			53	38	34	23	148	6.26058			2	3	2	3	3	3	1	3			19	28	19	24	20	30	8	148	6.26058			Archetype A4	1	3	1.5	2	2	3	0	2
2. Are there adaptation-related plans in place and implemented locally?	2.1 Are there adaptation-related planning tools having concrete implications locally?	3	3	1	2	2	2		48	39	26	20	133	5.62606	15.8629		2	2	2	3	1	3	2	2	2		21	23	17	20	11	30	11	133	5.62606	15.8629		All archetypes	1	2	2	2	3	3	2
	2.2. Are locally-relevant adaptation plans implemented?	2	2	1	1	2			36	29	17	13	95	4.01861			1	3	1	2	1	2.5	1	2			13	23	10	13	9	19	8	95	4.01861
	2.3. Are the main non-state actors contributing to the design and implementation of locally-relevant local plans/policies?	3	3	2	2	2			50	44	29	24	147	6.21827			2	3	3	2	2	3	2	2			18	29	22	16	18	30	14	147	6.21827			Composite index (= total aggregated median score at the whole sample scale, NO rescaling)							2
3. Are adequate actions taking place at a relevant scale to reduce coastal climate risks?	3.1 Are there actions targeting prominent climate hazards?	3	2	2	2	2	2		47	35	32	22	136	5.75296	15.4822		2	2	2	2	2	4	2	2	2		18	22	19	16	17	29	15	136	5.75296	15.4822
	3.2. Are there actions addressing the main drivers of coastal natural systems’ exposure & vulnerability?	2	2	2	2	2			29	26	32	19	106	4.48393			2	2	2	2	2	3	1	2			17	20	20	10	11	23	5	106	4.48393
	3.3. Are there actions addressing the main drivers of coastal human systems’ exposure & vulnerability?	3	2	2	2	2			47	30	26	21	124	5.24535			1	3	2	2	2	3	2	2			14	22	21	14	16	25	12	124	5.24535
4. Are there sufficient cross-scale institutional, human and financial capacities to implement adaptation locally?	4.1. Are there governance arrangements in place to support institutional capacities to coordinate adaptation activities locally (multi-scale governance and mainstreaming across policy areas/sectoral plans)?	3	3	2	2	2	2		53	39	31	20	143	6.04907	14.9746		1.5	3	3	2	2	3	2	2	2		18	29	19	17	16	30	14	143	6.04907	14.9746
	4.2. Are there enough human capacities in place at the relevant scale (primarily locally, but also nationally)?	3	2	1.5	2	2			41	35	24	15	115	4.86464			1	3	2	2	3	2.5	2	2			15	23	16	16	20	13	12	115	4.86464			CONFIDENCE LEVELS
	4.3. Is specific and sustainable funding available at the case study scale that is specifically dedicated to managing climate-related coastal risk and adaptation?	2	2	1.5	2	2			35	23	20	18	96	4.06091			1	2	2	2	3	2	2	2			8	19	16	9	17	18	9	96	4.06091				Median confidence levels
5. Is there evidence on effective reduction of current and projected coastal climate risk (including reducing hazards locally and managing long-term exposure and vulnerability)?	5.1. Is there evidence of risk reduction today?	2	1	1	1	1	2		33	23	16	10	82	3.4687	12.775		0.5	1	1.5	1	2	2	1	1	2		6	13	10	9	15	20	9	82	3.4687	12.775			Africa	America North	America Central & South	Asia	Australia & New Zealand	Europe	Small islands	All regions
	5.2. Are there indications that the policies and actions implemented at the case study scale contribute to minimize the risk of maladaptation in the long run?	1	1	0	1	1			25	20	12	11	68	2.87648			1	1	1	1	2	2	0	1			7	17	10	5	14	11	4	68	2.87648			Archetype A1	2	3	2	2	3	3	3	3
	5.3. Are there indications that the society (at the case study scale) is aware of the need to tackle both current and future coastal climate risks?	3	3	2	3	3			52	39	34	27	152	6.42978			1.5	3	3	3	3	3	2	3			13	30	27	19	20	27	16	152	6.42978			Archetype A2	2	3	2	2	3	3	3	2
6. Is a pathway-like approach considered?	6.1. Are locally-relevant adaptation goals established in the short-, medium- and long-term (respectively <10 years, 1-3 decades, more), and articulated with each other (i.e. how does reaching present-day goals support reaching longer-term ones)?	2	2	1	1.5	2	1		46	32	30	20	128	5.41455	11.8866		1	2	3	2	4	4	0	2	1		9	24	26	12	26	27	4	128	5.41455	11.8866		Archetype A3	1	2	2	2	2	3	3	2
	6.2. Are synergies and trade-offs (now and over time) between various adaptation-related options considered?	1	1	1.5	0.5	1			30	22	24	10	86	3.6379			0.5	2	1	1	3	3	0	1			3	17	12	7	20	24	3	86	3.6379			Archetype A4	2	3	3	3	2	2		3
	6.3. Are options planned in a sequenced manner and alternative strategies at the case study level?	1	1	0	1	1			27	17	13	10	67	2.83418			0	2	1	1	2	2	0	1			0	14	8	7	17	20	1	67	2.83418			All archetypes	2	3	2	2	3	3	3
		2	2	2	2				837	521	545	362	2364	100	100		1	2	2	2	3	3	2				261	451	345	283	331	483	210	2364	100	100
				Composite index (= total aggregated median score at the whole sample scale, NO rescaling)		2																Composite index (= total aggregated median score at the whole sample scale, NO rescaling)		2
CONFIDENCE LEVELS									Aggregated scores																		Aggregated scores (per region, across archetypes)											Composite index (= total aggregated median score at the whole sample scale, NO rescaling)							2
		Median confidence levels							Archetype A1	Archetype A2	Archetype A3	Archetype A4	All archetypes				Median confidence levels										Africa	America North	America Central & South	Asia	Australia & New Zealand	Europe	Small islands	All archetypes
		Archetype A1	Archetype A2	Archetype A3	Archetype A4	All archetypes							Aggregated score	%	%		Africa	America North	America Central & South	Asia	Australia & New Zealand	Europe	Small islands	All regions										Aggregated score	%	%
1. Does scientifically-based knowledge on current and future climate risks exist at the appropriate scale?	1.1. Are current climate-related coastal hazards known?	3	3	3	3	3	3		54	39	47	28	168	6.29685	24.0255		3	3	3	3	3	3	3	3	3		26	31	22	18	21	29	21	168	6.29685	24.0255
	1.2. Are current drivers of exposure and vulnerability of natural systems known?	3	3	3	3	3			49	37	44	27	157	5.88456			2	3	2	3	3	3	3	3			22	31	22	18	19	24	21	157	5.88456
	1.3. Are current drivers of exposure and vulnerability of human systems known?	3	3	2	3	3			51	39	42	26	158	5.92204			2	3	3	2	2	3	3	3			22	31	24	14	16	30	21	158	5.92204
	1.4. Are future climate risks projected (at a relevant/useful scale)?	3	3	3	3	3			48	41	43	26	158	5.92204			2	3	3	2	3	3	3	3			24	31	23	16	20	24	20	158	5.92204
2. Are there adaptation-related plans in place and implemented locally?	2.1 Are there adaptation-related planning tools having concrete implications locally?	3	3	3	3	3	3		50	40	40	28	158	5.92204	16.3418		2	3	3	2	3	3	3	3	3		22	31	25	13	21	26	20	158	5.92204	16.3418
	2.2. Are locally-relevant adaptation plans implemented?	3	2	2	2	2			47	34	35	19	135	5.05997			2	3	2	2	2	2.5	3	2			17	28	20	14	16	21	19	135	5.05997
	2.3. Are the main non-state actors contributing to the design and implementation of locally-relevant local plans/policies?	3	2	2	2	2			49	37	36	21	143	5.35982			2	3	2	2	2	3	3	2			20	29	20	14	17	25	18	143	5.35982
3. Are adequate actions taking place at a relevant scale to reduce coastal climate risks?	3.1 Are there actions targeting prominent climate hazards?	3	2	2	3	3	2		54	36	39	29	158	5.92204	16.2294		2	3	3	3	3	3	3	3	2		22	29	23	18	19	27	20	158	5.92204	16.2294
	3.2. Are there actions addressing the main drivers of coastal natural systems’ exposure & vulnerability?	2	2	2	3	2			37	32	38	26	133	4.98501			2	2	2	2	2	2.5	3	2			18	23	21	14	15	24	18	133	4.98501
	3.3. Are there actions addressing the main drivers of coastal human systems’ exposure & vulnerability?	3	2	2	2.5	2			47	32	39	24	142	5.32234			1.5	3	2	3	2	3	3	2			16	29	17	19	16	25	20	142	5.32234
4. Are there sufficient cross-scale institutional, human and financial capacities to implement adaptation locally?	4.1. Are there governance arrangements in place to support institutional capacities to coordinate adaptation activities locally (multi-scale governance and mainstreaming across policy areas/sectoral plans)?	3	3	2	2.5	2	2		46	37	35	20	138	5.17241	14.3178		1.5	3	2	2	2	3	3	2	2		17	29	17	15	15	27	18	138	5.17241	14.3178
	4.2. Are there enough human capacities in place at the relevant scale (primarily locally, but also nationally)?	2	2	2	2	2			41	33	35	20	129	4.83508			1.5	1	3	2	3	2	2	2			16	20	23	14	20	19	17	129	4.83508
	4.3. Is specific and sustainable funding available at the case study scale that is specifically dedicated to managing climate-related coastal risk and adaptation?	2	1	2	2	2			38	25	31	21	115	4.31034			1	2	2	1	3	2	1	2			16	20	19	10	18	20	12	115	4.31034
5. Is there evidence on effective reduction of current and projected coastal climate risk (including reducing hazards locally and managing long-term exposure and vulnerability)?	5.1. Is there evidence of risk reduction today?	2	2	2	2	2	2		39	33	30	21	123	4.61019	14.1304		1.5	2	2	2	2	2	2.5	2	2		17	21	16	14	15	22	18	123	4.61019	14.1304
	5.2. Are there indications that the policies and actions implemented at the case study scale contribute to minimize the risk of maladaptation in the long run?	2	2	2	3	2			35	33	33	23	124	4.64768			1	3	2	2	1	2.5	2	2			15	26	22	13	10	22	16	124	4.64768
	5.3. Are there indications that the society (at the case study scale) is aware of the need to tackle both current and future coastal climate risks?	2	3	2	2	2			39	34	36	21	130	4.87256			1	2	3	3	1	2	2	2			15	26	23	16	13	21	16	130	4.87256
6. Is a pathway-like approach considered?	6.1. Are locally-relevant adaptation goals established in the short-, medium- and long-term (respectively <10 years, 1-3 decades, more), and articulated with each other (i.e. how does reaching present-day goals support reaching longer-term ones)?	3	2	2	3	2	2		46	34	39	25	144	5.3973	14.955		2	3	2	2	3	3	2	2	2		21	29	19	13	21	25	16	144	5.3973	14.955
	6.2. Are synergies and trade-offs (now and over time) between various adaptation-related options considered?	2	2	2	3	2			37	30	33	25	125	4.68516			1	3	2	1	2	2	2.5	2			9	28	21	11	16	23	17	125	4.68516
	6.3. Are options planned in a sequenced manner and alternative strategies at the case study level?	2	2	2	3	2			37	30	39	24	130	4.87256			1	3	2	1	2	2	2.5	2			14	29	19	12	17	22	17	130	4.87256
		3	2	2	3	2			844	656	714	454	2668	100	100		2	3	2	2	3	3	3	2			349	521	396	276	325	456	345	2668	100	100
				Composite index (= total aggregated median score at the whole sample scale, NO rescaling)		2																Composite index (= total aggregated median score at the whole sample scale, NO rescaling)		2

## Sheet: 4b. Synthesis ARCHETYPES (wit
Synthesis ARCHETYPES (across regions)
Assessment ROUNDS 1 and 2 (Oct. 2022, Jan. 2023)
GAP-Track_Expert judgment assessment grid _All regions_All experts
Adaptation Challenge considered: coastal adaptation
Rescaling approach to harmonize the number of cases per archetype —> See Data-sheet “SI2.Number case studies + Rescaling process”
SCORES
Guiding questions		Median scores							Aggregated scores								RESCALED aggregated scores on a 10-case basis (to harmonize aggregated scores according to the number of case studies per archetype; see Data-sheet SI3)
		Archetype 1	Archetype 2	Archetype 3	Archetype 4	All archetypes			Archetype 1	Archetype 2	Archetype 3	Archetype 4	All archetypes					Archetype 1	Archetype 2	Archetype 3	Archetype 4	All archetypes
													Aggregated score	%	%							Aggregated score	%	%
1. Does scientifically-based knowledge on current and future climate risks exist at the appropriate scale?	1.1. Are current climate-related coastal hazards known?	4	3	3	3	3	3		66	45	49	28	188	7.95262	29.0186		Q1.1	34.7368	30	28.8235	28	121.56	7.91178	28.8907
	1.2. Are current drivers of exposure and vulnerability of natural systems known?	3	3	3	2.5	3			57	38	50	26	171	7.2335			Q1.2	30	25.3333	29.4118	26	110.745	7.20787
	1.3. Are current drivers of exposure and vulnerability of human systems known?	3	3	3	2.5	3			62	46	46	25	179	7.57191			Q1.3	32.6316	30.6667	27.0588	25	115.357	7.50804
	1.4. Are future climate risks projected (at a relevant/useful scale)?	3	3	2	2	3			53	38	34	23	148	6.26058			Q1.4	27.8947	25.3333	20	23	96.2281	6.26302
2. Are there adaptation-related plans in place and implemented locally?	2.1 Are there adaptation-related planning tools having concrete implications locally?	3	3	1	2	2	2		48	39	26	20	133	5.62606	15.8629		Q2.1	25.2632	26	15.2941	20	86.5573	5.6336	15.9163
	2.2. Are locally-relevant adaptation plans implemented?	2	2	1	1	2			36	29	17	13	95	4.01861			Q2.2	18.9474	19.3333	10	13	61.2807	3.98847
	2.3. Are the main non-state actors contributing to the design and implementation of locally-relevant local plans/policies?	3	3	2	2	2			50	44	29	24	147	6.21827			Q2.3	26.3158	29.3333	17.0588	24	96.7079	6.29425
3. Are adequate actions taking place at a relevant scale to reduce coastal climate risks?	3.1 Are there actions targeting prominent climate hazards?	3	2	2	2	2	2		47	35	32	22	136	5.75296	15.4822		Q3.1	24.7368	23.3333	18.8235	22	88.8937	5.78566	15.6429
	3.2. Are there actions addressing the main drivers of coastal natural systems’ exposure & vulnerability?	2	2	2	2	2			29	26	32	19	106	4.48393			Q3.2	15.2632	17.3333	18.8235	19	70.42	4.5833
	3.3. Are there actions addressing the main drivers of coastal human systems’ exposure & vulnerability?	3	2	2	2	2			47	30	26	21	124	5.24535			Q3.3	24.7368	20	15.2941	21	81.031	5.27392
4. Are there sufficient cross-scale institutional, human and financial capacities to implement adaptation locally?	4.1. Are there governance arrangements in place to support institutional capacities to coordinate adaptation activities locally (multi-scale governance and mainstreaming across policy areas/sectoral plans)?	3	3	2	2	2	2		53	39	31	20	143	6.04907	14.9746		Q4.1	27.8947	26	18.2353	20	92.13	5.9963	14.9487
	4.2. Are there enough human capacities in place at the relevant scale (primarily locally, but also nationally)?	3	2	1.5	2	2			41	35	24	15	115	4.86464			Q4.2	21.5789	23.3333	14.1176	15	74.0299	4.81825
	4.3. Is specific and sustainable funding available at the case study scale that is specifically dedicated to managing climate-related coastal risk and adaptation?	2	2	1.5	2	2			35	23	20	18	96	4.06091			Q4.3	18.4211	15.3333	11.7647	18	63.5191	4.13415
5. Is there evidence on effective reduction of current and projected coastal climate risk (including reducing hazards locally and managing long-term exposure and vulnerability)?	5.1. Is there evidence of risk reduction today?	2	1	1	1	1	2		33	23	16	10	82	3.4687	12.775		Q5.1	17.3684	15.3333	9.41176	10	52.1135	3.39182	12.8239
	5.2. Are there indications that the policies and actions implemented at the case study scale contribute to minimize the risk of maladaptation in the long run?	1	1	0	1	1			25	20	12	11	68	2.87648			Q5.2	13.1579	13.3333	7.05882	11	44.5501	2.89955
	5.3. Are there indications that the society (at the case study scale) is aware of the need to tackle both current and future coastal climate risks?	3	3	2	3	3			52	39	34	27	152	6.42978			Q5.3	27.3684	26	20	27	100.368	6.5325
6. Is a pathway-like approach considered?	6.1. Are locally-relevant adaptation goals established in the short-, medium- and long-term (respectively <10 years, 1-3 decades, more), and articulated with each other (i.e. how does reaching present-day goals support reaching longer-term ones)?	2	2	1	1.5	2	1		46	32	30	20	128	5.41455	11.8866		Q6.1	24.2105	21.3333	17.6471	20	83.1909	5.4145	11.7775
	6.2. Are synergies and trade-offs (now and over time) between various adaptation-related options considered?	1	1	1.5	0.5	1			30	22	24	10	86	3.6379			Q6.2	15.7895	14.6667	14.1176	10	54.5738	3.55195
	6.3. Are options planned in a sequenced manner and alternative strategies at the case study level?	1	1	0	1	1			27	17	13	10	67	2.83418			Q6.3	14.2105	11.3333	7.64706	10	43.1909	2.81109
		2	2	2	2				837	620	545	362	2364	100	100			440.526	413.333	320.588	362	1536.45	100	100
				Composite index (= total aggregated median score at the whole sample scale, NO rescaling)		2															Rescaling factor	0.649936
																	On a 10-case basis and a 0-4 scale
																	Rescaled aggregated score (min-max)	Minimum per archetype	0	0	Minimum for all 4 archetypes	0	0
																		Maximum per archetype	760	4	Maximum for all 4 archetypes	3040	4
																	Rescaled aggregated score (sample)	Archetype 1	Archetype 2	Archetype 3	Archetype 4	All Archetypes
																		2.31856	2.17544	1.68731	1.90526	2.02164
CONFIDENCE LEVELS
		Median confidence levels							Aggregated scores								RESCALED aggregated scores on a 10-case basis (to harmonize aggregated scores according to the number of case studies per archetype; see Data-sheet SI3)
		Archetype 1	Archetype 2	Archetype 3	Archetype 4	All archetypes			Archetype 1	Archetype 2	Archetype 3	Archetype 4	All archetypes					Archetype 1	Archetype 2	Archetype 3	Archetype 4	All archetypes
													Aggregated score	%	%							Aggregated score	%	%
1. Does scientifically-based knowledge on current and future climate risks exist at the appropriate scale?	1.1. Are current climate-related coastal hazards known?	3	3	3	3	3	3		54	39	47	28	168	6.29685	24.0255		Q1.1	28.4211	26	27.6471	28	110.068	7.1638	23.9724
	1.2. Are current drivers of exposure and vulnerability of natural systems known?	3	3	3	3	3			49	37	44	27	157	5.88456			Q1.2	25.7895	24.6667	25.8824	27	103.338	6.72581
	1.3. Are current drivers of exposure and vulnerability of human systems known?	3	3	2	3	3			51	39	42	26	158	5.92204			Q1.3	26.8421	26	24.7059	26	103.548	6.73944
	1.4. Are future climate risks projected (at a relevant/useful scale)?	3	3	3	3	3			48	41	43	26	158	5.92204			Q1.4	25.2632	27.3333	25.2941	26	103.891	6.76174
2. Are there adaptation-related plans in place and implemented locally?	2.1 Are there adaptation-related planning tools having concrete implications locally?	3	3	3	3	3	3		50	40	40	28	158	5.92204	16.3418		Q2.1	26.3158	26.6667	23.5294	28	104.512	6.80217	16.1851
	2.2. Are locally-relevant adaptation plans implemented?	3	2	2	2	2			47	34	35	19	135	5.05997			Q2.2	24.7368	22.6667	20.5882	19	86.9917	5.66187
	2.3. Are the main non-state actors contributing to the design and implementation of locally-relevant local plans/policies?	3	2	2	2	2			49	37	36	21	143	5.35982			Q2.3	25.7895	24.6667	21.1765	21	92.6326	6.02901
3. Are adequate actions taking place at a relevant scale to reduce coastal climate risks?	3.1 Are there actions targeting prominent climate hazards?	3	2	2	3	3	2		54	36	39	29	158	5.92204	16.2294		Q3.1	28.4211	24	22.9412	29	104.362	6.79244	16.3216
	3.2. Are there actions addressing the main drivers of coastal natural systems’ exposure & vulnerability?	2	2	2	3	2			37	32	38	26	133	4.98501			Q3.2	19.4737	21.3333	22.3529	26	89.16	5.80299
	3.3. Are there actions addressing the main drivers of coastal human systems’ exposure & vulnerability?	3	2	2	2.5	2			47	32	39	24	142	5.32234			Q3.3	24.7368	21.3333	22.9412	24	93.0114	6.05366
4. Are there sufficient cross-scale institutional, human and financial capacities to implement adaptation locally?	4.1. Are there governance arrangements in place to support institutional capacities to coordinate adaptation activities locally (multi-scale governance and mainstreaming across policy areas/sectoral plans)?	3	3	2	2.5	2	2		46	37	35	20	138	5.17241	14.3178		Q4.1	24.2105	24.6667	20.5882	20	89.4654	5.82287	14.2141
	4.2. Are there enough human capacities in place at the relevant scale (primarily locally, but also nationally)?	2	2	2	2	2			41	33	35	20	129	4.83508			Q4.2	21.5789	22	20.5882	20	84.1672	5.47804
	4.3. Is specific and sustainable funding available at the case study scale that is specifically dedicated to managing climate-related coastal risk and adaptation?	2	1	2	2	2			38	25	31	21	115	4.31034			Q4.3	20	16.6667	18.2353	21	75.902	4.94009
5. Is there evidence on effective reduction of current and projected coastal climate risk (including reducing hazards locally and managing long-term exposure and vulnerability)?	5.1. Is there evidence of risk reduction today?	2	2	2	2	2	2		39	33	30	21	123	4.61019	14.1304		Q5.1	20.5263	22	17.6471	21	81.1734	5.28318	14.205
	5.2. Are there indications that the policies and actions implemented at the case study scale contribute to minimize the risk of maladaptation in the long run?	2	2	2	3	2			35	33	33	23	124	4.64768			Q5.2	18.4211	22	19.4118	23	82.8328	5.39119
	5.3. Are there indications that the society (at the case study scale) is aware of the need to tackle both current and future coastal climate risks?	2	3	2	2	2			39	34	36	21	130	4.87256			Q5.3	20.5263	22.6667	21.1765	21	85.3695	5.55629
6. Is a pathway-like approach considered?	6.1. Are locally-relevant adaptation goals established in the short-, medium- and long-term (respectively <10 years, 1-3 decades, more), and articulated with each other (i.e. how does reaching present-day goals support reaching longer-term ones)?	3	2	2	3	2	2		46	34	39	25	144	5.3973	14.955		Q6.1	24.2105	22.6667	22.9412	25	94.8184	6.17127	15.1018
	6.2. Are synergies and trade-offs (now and over time) between various adaptation-related options considered?	2	2	2	3	2			37	30	33	25	125	4.68516			Q6.2	19.4737	20	19.4118	25	83.8854	5.4597
	6.3. Are options planned in a sequenced manner and alternative strategies at the case study level?	2	2	2	3	2			37	30	39	24	130	4.87256			Q6.3	19.4737	20	22.9412	24	86.4149	5.62433
		3	2	2	3	2			844	656	714	454	2668	100	100			444.211	437.333	420	454	1755.54	114.26	100
				Composite index (= total aggregated median score at the whole sample scale, NO rescaling)		2															Rescaling factor	0.658
																	On a 10-case basis and a 0-4 scale
																	Rescaled aggregated confidence level (min-max)	Minimum per archetype	0	0	Minimum for all 4 archetypes	0	0
																		Maximum per archetype	570	3	Maximum for all 4 archetypes	2280	3
																	Rescaled aggregated confidence level (sample)	Archetype 1	Archetype 2	Archetype 3	Archetype 4	All Archetypes
																		2.33795	2.30175	2.21053	2.38947	2.30993

## Sheet: S4c. Synthesis REGIONS (with r
Synthesis REGIONS (across archetypes)
Assessment ROUNDS 1 and 2 (Oct. 2022, Jan. 2023)
GAP-Track_Expert judgment assessment grid _All regions_All experts
Adaptation Challenge considered: coastal adaptation
Rescaling approach to harmonize the number of cases per archetype —> See Data-sheet “SI2.Number case studies + Rescaling process”
SCORES
Guiding questions		Median scores										Aggregated scores											RESCALED aggregated scores on a 10-case basis (to harmonize aggregated scores according to the number of case studies per region; see Data-sheet SI3)
		Africa	America North	America Central & South	Asia	Australia & New Zealand	Europe	Small Islands	All regions			Africa	America North	America Central & South	Asia	Australia & New Zealand	Europe	Small Islands	All archetypes					Africa	America North	America Central & South	Asia	Australia & New Zealand	Europe	Small Islands	All archetypes
																			Aggregated score	%	%										Aggregated score	%	%
1. Does scientifically-based knowledge on current and future climate risks exist at the appropriate scale?	1.1. Are current climate-related coastal hazards known?	3	3	3	3	3	4	3	3	3		25	35	23	24	22	37	22	188	7.95262	29.0186		Q1.1	25	31.8182	25.5556	34.2857	31.4286	37	31.4286	216.517	7.97637	29.1736
	1.2. Are current drivers of exposure and vulnerability of natural systems known?	2	4	3	3	3	4	3	3			18	35	22	23	20	31	22	171	7.2335			Q1.2	18	31.8182	24.4444	32.8571	28.5714	31	31.4286	198.12	7.29864
	1.3. Are current drivers of exposure and vulnerability of human systems known?	2	3	3	3	3	4	3	3			19	28	28	22	22	39	21	179	7.57191			Q1.3	19	25.4545	31.1111	31.4286	31.4286	39	30	207.423	7.64136
	1.4. Are future climate risks projected (at a relevant/useful scale)?	2	3	2	3	3	3	1	3			19	28	19	24	20	30	8	148	6.26058			Q1.4	19	25.4545	21.1111	34.2857	28.5714	30	11.4286	169.851	6.25724
2. Are there adaptation-related plans in place and implemented locally?	2.1 Are there adaptation-related planning tools having concrete implications locally?	2	2	2	3	1	3	2	2	2		21	23	17	20	11	30	11	133	5.62606	15.8629		Q2.1	21	20.9091	18.8889	28.5714	15.7143	30	15.7143	150.798	5.55533	15.6588
	2.2. Are locally-relevant adaptation plans implemented?	1	3	1	2	1	2.5	1	2			13	23	10	13	9	19	8	95	4.01861			Q2.2	13	20.9091	11.1111	18.5714	12.8571	19	11.4286	106.877	3.93731
	2.3. Are the main non-state actors contributing to the design and implementation of locally-relevant local plans/policies?	2	3	3	2	2	3	2	2			18	29	22	16	18	30	14	147	6.21827			Q2.3	18	26.3636	24.4444	22.8571	25.7143	30	20	167.38	6.16618
3. Are adequate actions taking place at a relevant scale to reduce coastal climate risks?	3.1 Are there actions targeting prominent climate hazards?	2	2	2	2	2	4	2	2	2		18	22	19	16	17	29	15	136	5.75296	15.4822		Q3.1	18	20	21.1111	22.8571	24.2857	29	21.4286	156.683	5.77211	15.346
	3.2. Are there actions addressing the main drivers of coastal natural systems’ exposure & vulnerability?	2	2	2	2	2	3	1	2			17	20	20	10	11	23	5	106	4.48393			Q3.2	17	18.1818	22.2222	14.2857	15.7143	23	7.14286	117.547	4.33037
	3.3. Are there actions addressing the main drivers of coastal human systems’ exposure & vulnerability?	1	3	2	2	2	3	2	2			14	22	21	14	16	25	12	124	5.24535			Q3.3	14	20	23.3333	20	22.8571	25	17.1429	142.333	5.24349
4. Are there sufficient cross-scale institutional, human and financial capacities to implement adaptation locally?	4.1. Are there governance arrangements in place to support institutional capacities to coordinate adaptation activities locally (multi-scale governance and mainstreaming across policy areas/sectoral plans)?	1.5	3	3	2	2	3	2	2	2		18	29	19	17	16	30	14	143	6.04907	14.9746		Q4.1	18	26.3636	21.1111	24.2857	22.8571	30	20	162.618	5.99075	15.0647
	4.2. Are there enough human capacities in place at the relevant scale (primarily locally, but also nationally)?	1	3	2	2	3	2.5	2	2			15	23	16	16	20	13	12	115	4.86464			Q4.2	15	20.9091	17.7778	22.8571	28.5714	13	17.1429	135.258	4.98285
	4.3. Is specific and sustainable funding available at the case study scale that is specifically dedicated to managing climate-related coastal risk and adaptation?	1	2	2	2	3	2	2	2			8	19	16	9	17	18	9	96	4.06091			Q4.3	8	17.2727	17.7778	12.8571	24.2857	18	12.8571	111.051	4.09105
5. Is there evidence on effective reduction of current and projected coastal climate risk (including reducing hazards locally and managing long-term exposure and vulnerability)?	5.1. Is there evidence of risk reduction today?	0.5	1	1.5	1	2	2	1	1	2		6	13	10	9	15	20	9	82	3.4687	12.775		Q5.1	6	11.8182	11.1111	12.8571	21.4286	20	12.8571	96.0722	3.53925	12.8695
	5.2. Are there indications that the policies and actions implemented at the case study scale contribute to minimize the risk of maladaptation in the long run?	1	1	1	1	2	2	0	1			7	17	10	5	14	11	4	68	2.87648			Q5.2	7	15.4545	11.1111	7.14286	20	11	5.71429	77.4228	2.85222
	5.3. Are there indications that the society (at the case study scale) is aware of the need to tackle both current and future coastal climate risks?	1.5	3	3	3	3	3	2	3			13	30	27	19	20	27	16	152	6.42978			Q5.3	13	27.2727	30	27.1429	28.5714	27	22.8571	175.844	6.47801
6. Is a pathway-like approach considered?	6.1. Are locally-relevant adaptation goals established in the short-, medium- and long-term (respectively <10 years, 1-3 decades, more), and articulated with each other (i.e. how does reaching present-day goals support reaching longer-term ones)?	1	2	3	2	4	4	0	2	1		9	24	26	12	26	27	4	128	5.41455	11.8866		Q6.1	9	21.8182	28.8889	17.1429	37.1429	27	5.71429	146.707	5.40462	11.8875
	6.2. Are synergies and trade-offs (now and over time) between various adaptation-related options considered?	0.5	2	1	1	3	3	0	1			3	17	12	7	20	24	3	86	3.6379			Q6.2	3	15.4545	13.3333	10	28.5714	24	4.28571	98.645	3.63404
	6.3. Are options planned in a sequenced manner and alternative strategies at the case study level?	0	2	1	1	2	2	0	1			0	14	8	7	17	20	1	67	2.83418			Q6.3	0	12.7273	8.88889	10	24.2857	20	1.42857	77.3304	2.84882
		1	2	2	2	3	3	2				261	451	345	283	331	483	210	2364	100	100			261	410	383.333	404.286	472.857	483	300	2714.48	100	100
							Composite index (= total aggregated median score at the whole sample scale, NO rescaling)		2																					Rescaling factor	1.14826
																							On a 10-case basis and a 0-4 scale
																							Rescaled aggregated score (min-max)	Minimum per region	0	0			Minimum for all 7 regions	0	0
																								Maximum per region	760	4			Maximum for all 7 regions	5320	4
																							Rescaled aggregated score (sample)	Africa	America North	America Central & South	Asia	Australia & New Zealand	Europe	Small Islands	All regions
																								1.37368	2.15789	2.01754	2.12782	2.48872	2.54211	1.57895	2.04096
CONFIDENCE LEVELS
		Median confidence levels										Aggregated scores											RESCALED aggregated scores on a 10-case basis (to harmonize aggregated scores according to the number of case studies per region; see Data-sheet SI3)
		Africa	America North	America Central & South	Asia	Australia & New Zealand	Europe	Small islands	All regions			Africa	America North	America Central & South	Asia	Australia & New Zealand	Europe	Small Islands	All archetypes					Africa	America North	America Central & South	Asia	Australia & New Zealand	Europe	Small Islands	All archetypes
																			Aggregated score	%	%										Aggregated score	%	%
1. Does scientifically-based knowledge on current and future climate risks exist at the appropriate scale?	1.1. Are current climate-related coastal hazards known?	3	3	3	3	3	3	3	3	3		26	31	22	18	21	29	21	168	6.29685	24.0255		Q1.1	26	28.1818	24.4444	25.7143	30	29	30	193.341	7.12257	27.1237
	1.2. Are current drivers of exposure and vulnerability of natural systems known?	2	3	2	3	3	3	3	3			22	31	22	18	19	24	21	157	5.88456			Q1.2	22	28.1818	24.4444	25.7143	27.1429	24	30	181.483	6.68576
	1.3. Are current drivers of exposure and vulnerability of human systems known?	2	3	3	2	2	3	3	3			22	31	24	14	16	30	21	158	5.92204			Q1.3	22	28.1818	26.6667	20	22.8571	30	30	179.706	6.62027
	1.4. Are future climate risks projected (at a relevant/useful scale)?	2	3	3	2	3	3	3	3			24	31	23	16	20	24	20	158	5.92204			Q1.4	24	28.1818	25.5556	22.8571	28.5714	24	28.5714	181.737	6.69512
2. Are there adaptation-related plans in place and implemented locally?	2.1 Are there adaptation-related planning tools having concrete implications locally?	2	3	3	2	3	3	3	3	3		22	31	25	13	21	26	20	158	5.92204	16.3418		Q2.1	22	28.1818	27.7778	18.5714	30	26	28.5714	181.102	6.67173	18.4332
	2.2. Are locally-relevant adaptation plans implemented?	2	3	2	2	2	2.5	3	2			17	28	20	14	16	21	19	135	5.05997			Q2.2	17	25.4545	22.2222	20	22.8571	21	27.1429	155.677	5.73506
	2.3. Are the main non-state actors contributing to the design and implementation of locally-relevant local plans/policies?	2	3	2	2	2	3	3	2			20	29	20	14	17	25	18	143	5.35982			Q2.3	20	26.3636	22.2222	20	24.2857	25	25.7143	163.586	6.02642
3. Are adequate actions taking place at a relevant scale to reduce coastal climate risks?	3.1 Are there actions targeting prominent climate hazards?	2	3	3	3	3	3	3	3	2		22	29	23	18	19	27	20	158	5.92204	16.2294		Q3.1	22	26.3636	25.5556	25.7143	27.1429	27	28.5714	182.348	6.7176	18.4403
	3.2. Are there actions addressing the main drivers of coastal natural systems’ exposure & vulnerability?	2	2	2	2	2	2.5	3	2			18	23	21	14	15	24	18	133	4.98501			Q3.2	18	20.9091	23.3333	20	21.4286	24	25.7143	153.385	5.65064
	3.3. Are there actions addressing the main drivers of coastal human systems’ exposure & vulnerability?	1.5	3	2	3	2	3	3	2			16	29	17	19	16	25	20	142	5.32234			Q3.3	16	26.3636	18.8889	27.1429	22.8571	25	28.5714	164.824	6.07204
4. Are there sufficient cross-scale institutional, human and financial capacities to implement adaptation locally?	4.1. Are there governance arrangements in place to support institutional capacities to coordinate adaptation activities locally (multi-scale governance and mainstreaming across policy areas/sectoral plans)?	1.5	3	2	2	2	3	3	2	2		17	29	17	15	15	27	18	138	5.17241	14.3178		Q4.1	17	26.3636	18.8889	21.4286	21.4286	27	25.7143	157.824	5.81416	16.2777
	4.2. Are there enough human capacities in place at the relevant scale (primarily locally, but also nationally)?	1.5	1	3	2	3	2	2	2			16	20	23	14	20	19	17	129	4.83508			Q4.2	16	18.1818	25.5556	20	28.5714	19	24.2857	151.595	5.58467
	4.3. Is specific and sustainable funding available at the case study scale that is specifically dedicated to managing climate-related coastal risk and adaptation?	1	2	2	1	3	2	1	2			16	20	19	10	18	20	12	115	4.31034			Q4.3	16	18.1818	21.1111	14.2857	25.7143	20	17.1429	132.436	4.87887
5. Is there evidence on effective reduction of current and projected coastal climate risk (including reducing hazards locally and managing long-term exposure and vulnerability)?	5.1. Is there evidence of risk reduction today?	1.5	2	2	2	2	2	2.5	2	2		17	21	16	14	15	22	18	123	4.61019	14.1304		Q5.1	17	19.0909	17.7778	20	21.4286	22	25.7143	143.012	5.26848	15.962
	5.2. Are there indications that the policies and actions implemented at the case study scale contribute to minimize the risk of maladaptation in the long run?	1	3	2	2	1	2.5	2	2			15	26	22	13	10	22	16	124	4.64768			Q5.2	15	23.6364	24.4444	18.5714	14.2857	22	22.8571	140.795	5.18682
	5.3. Are there indications that the society (at the case study scale) is aware of the need to tackle both current and future coastal climate risks?	1	2	3	3	1	2	2	2			15	26	23	16	13	21	16	130	4.87256			Q5.3	15	23.6364	25.5556	22.8571	18.5714	21	22.8571	149.478	5.50668
6. Is a pathway-like approach considered?	6.1. Are locally-relevant adaptation goals established in the short-, medium- and long-term (respectively <10 years, 1-3 decades, more), and articulated with each other (i.e. how does reaching present-day goals support reaching longer-term ones)?	2	3	2	2	3	3	2	2	2		21	29	19	13	21	25	16	144	5.3973	14.955		Q6.1	21	26.3636	21.1111	18.5714	30	25	22.8571	164.903	6.07496	16.8628
	6.2. Are synergies and trade-offs (now and over time) between various adaptation-related options considered?	1	3	2	1	2	2	2.5	2			9	28	21	11	16	23	17	125	4.68516			Q6.2	9	25.4545	23.3333	15.7143	22.8571	23	24.2857	143.645	5.29181
	6.3. Are options planned in a sequenced manner and alternative strategies at the case study level?	1	3	2	1	2	2	2.5	2			14	29	19	12	17	22	17	130	4.87256			Q6.3	14	26.3636	21.1111	17.1429	24.2857	22	24.2857	149.189	5.49605
		2	3	2	2	3	3	3	2			349	521	396	276	325	456	345	2668	100	100			349	473.636	440	394.286	464.286	456	492.857	3070.06	113.1	113.1
							Composite index (= total aggregated median score at the whole sample scale, NO rescaling)		2																					Rescaling factor	1.1507
																							On a 10-case basis and a 0-4 scale
																							Rescaled aggregated score (min-max)	Minimum per region	0	0			Minimum for all 7 regions	0	0
																								Maximum per region	760	4			Maximum for all 7 regions	5320	4
																							Rescaled aggregated score (sample)	Africa	America North	America Central & South	Asia	Australia & New Zealand	Europe	Small Islands	All regions
																								1.83684	2.49282	2.31579	2.07519	2.44361	2.4	2.59398	2.30832

## Sheet: 4d. Synthesis GLOBAL (all arc
Synthesis GLOBAL (all case studies, archetypes and regions)
Assessment ROUNDS 1 and 2 (Oct. 2022, Jan. 2023)
GAP-Track_Expert judgment assessment grid _All regions_All experts
Adaptation Challenge considered: coastal adaptation
No rescaling approach because all case studies are brought together with no weighting
ORIGINAL DATA (no weighting)
SCORES
Guiding questions		Median score		Aggregated score
		Per sub-question (QX.X)	Per overarching question (Q)	Number	%
1. Does scientifically-based knowledge on current and future climate risks exist at the appropriate scale?	1.1. Are current climate-related coastal hazards known?	3	3	188	29.0186
	1.2. Are current drivers of exposure and vulnerability of natural systems known?	3		171
	1.3. Are current drivers of exposure and vulnerability of human systems known?	3		179
	1.4. Are future climate risks projected (at a relevant/useful scale)?	3		148
2. Are there adaptation-related plans in place and implemented locally?	2.1 Are there adaptation-related planning tools having concrete implications locally?	2	2	133	15.8629
	2.2. Are locally-relevant adaptation plans implemented?	2		95
	2.3. Are the main non-state actors contributing to the design and implementation of locally-relevant local plans/policies?	2		147
3. Are adequate actions taking place at a relevant scale to reduce coastal climate risks?	3.1 Are there actions targeting prominent climate hazards?	2	2	136	15.4822
	3.2. Are there actions addressing the main drivers of coastal natural systems’ exposure & vulnerability?	2		106
	3.3. Are there actions addressing the main drivers of coastal human systems’ exposure & vulnerability?	2		124
4. Are there sufficient cross-scale institutional, human and financial capacities to implement adaptation locally?	4.1. Are there governance arrangements in place to support institutional capacities to coordinate adaptation activities locally (multi-scale governance and mainstreaming across policy areas/sectoral plans)?	2	2	143	14.9746
	4.2. Are there enough human capacities in place at the relevant scale (primarily locally, but also nationally)?	2		115
	4.3. Is specific and sustainable funding available at the case study scale that is specifically dedicated to managing climate-related coastal risk and adaptation?	2		96
5. Is there evidence on effective reduction of current and projected coastal climate risk (including reducing hazards locally and managing long-term exposure and vulnerability)?	5.1. Is there evidence of risk reduction today?	1	2	82	12.775
	5.2. Are there indications that the policies and actions implemented at the case study scale contribute to minimize the risk of maladaptation in the long run?	1		68
	5.3. Are there indications that the society (at the case study scale) is aware of the need to tackle both current and future coastal climate risks?	3		152
6. Is a pathway-like approach considered?	6.1. Are locally-relevant adaptation goals established in the short-, medium- and long-term (respectively <10 years, 1-3 decades, more), and articulated with each other (i.e. how does reaching present-day goals support reaching longer-term ones)?	2	1	128	11.8866
	6.2. Are synergies and trade-offs (now and over time) between various adaptation-related options considered?	1		86
	6.3. Are options planned in a sequenced manner and alternative strategies at the case study level?	1		67
	Composite index (= total aggregated median score at the whole sample scale, NO rescaling)	2		2364
CONFIDENCE LEVELS
Guiding questions		Median confidence levels (all archetypes and regions)
1. Does scientifically-based knowledge on current and future climate risks exist at the appropriate scale?	1.1. Are current climate-related coastal hazards known?	3	3
	1.2. Are current drivers of exposure and vulnerability of natural systems known?	3
	1.3. Are current drivers of exposure and vulnerability of human systems known?	3
	1.4. Are future climate risks projected (at a relevant/useful scale)?	3
2. Are there adaptation-related plans in place and implemented locally?	2.1 Are there adaptation-related planning tools having concrete implications locally?	3	3
	2.2. Are locally-relevant adaptation plans implemented?	2
	2.3. Are the main non-state actors contributing to the design and implementation of locally-relevant local plans/policies?	2
3. Are adequate actions taking place at a relevant scale to reduce coastal climate risks?	3.1 Are there actions targeting prominent climate hazards?	3	2
	3.2. Are there actions addressing the main drivers of coastal natural systems’ exposure & vulnerability?	2
	3.3. Are there actions addressing the main drivers of coastal human systems’ exposure & vulnerability?	2
4. Are there sufficient cross-scale institutional, human and financial capacities to implement adaptation locally?	4.1. Are there governance arrangements in place to support institutional capacities to coordinate adaptation activities locally (multi-scale governance and mainstreaming across policy areas/sectoral plans)?	2	2
	4.2. Are there enough human capacities in place at the relevant scale (primarily locally, but also nationally)?	2
	4.3. Is specific and sustainable funding available at the case study scale that is specifically dedicated to managing climate-related coastal risk and adaptation?	2
5. Is there evidence on effective reduction of current and projected coastal climate risk (including reducing hazards locally and managing long-term exposure and vulnerability)?	5.1. Is there evidence of risk reduction today?	2	2
	5.2. Are there indications that the policies and actions implemented at the case study scale contribute to minimize the risk of maladaptation in the long run?	2
	5.3. Are there indications that the society (at the case study scale) is aware of the need to tackle both current and future coastal climate risks?	2
6. Is a pathway-like approach considered?	6.1. Are locally-relevant adaptation goals established in the short-, medium- and long-term (respectively <10 years, 1-3 decades, more), and articulated with each other (i.e. how does reaching present-day goals support reaching longer-term ones)?	2	2
	6.2. Are synergies and trade-offs (now and over time) between various adaptation-related options considered?	2
	6.3. Are options planned in a sequenced manner and alternative strategies at the case study level?	2
	Composite index (= total aggregated median score at the whole sample scale, NO rescaling)	2

## Sheet: 4e. Synthesis CASE STUDIES
Synthesis LOCAL CASE STUDIES (all archetypes and regions)
Assessment ROUNDS 1 and 2 (Oct. 2022, Jan. 2023)
GAP-Track_Expert judgment assessment grid _ALL REGIONS_All experts
Adaptation Challenge considered: coastal adaptation
Some further guidance: - Guidance on scope and scale is included (italics) for each sub-question - NA (Not Assessed) applies when the experts are not able to score, e.g; because they don’t know is information is available. Score 0 applies when experts know that information doesn’t exist.
SCORES
		EUR	ANO	SMI	ACS	EUR	ANZ	ANZ	ANZ	ANZ	ACS	ANO	ASI	AFR	ACS	ANO	ACS	ACS	EUR	AFR	AFR	ASI	ANZ	ANO	ANZ	EUR	SMI	ANO	ASI	AFR	ASI	EUR	AFR	EUR	SMI	ASI	ANO	ACS	ANO	ACS	ASI	AFR	EUR	SMI	SMI	ANO	ASI	SMI	EUR
Guiding questions		A3	A2	A3	A4	A3	A1	A2	A4	A3	A4	A3	A2	A1	A2	A2	A3	A3	A2	A1	A2	A4	A1	A2	A2	A1	A1	A4	A1	A3	A3	A1	A1	A1	A1	A3	A3	A1	A1	A1	A1	A3	A2	A1	A1	A3	A2	A2	A1
		Aland islands, Finland	Anchorage, USA	Anguilla Island	Artemisa, Cuba	Asturias, Spain	Auckland, New Zealand	Bunbury, Australia	Burketown, Australia	Byron Bay, Australia	Cahuita, Costa Rica	Cancun, Mexico	Can Tho Citiy, Vietnam	Cape Town, South Africa	Cartagena de Indias, Colombia	Charleston, USA	Cienaga Gr. de Sant. M., Colombia	Colon province, Panama	Cork, Ireland	Douala, Cameroon	Durban, South Africa	Ghoramara, India	Gold Coast, Australia	Halifax, Canada	Hawke’s Bay, New Zealand	Helsinki, Finland	Honolulu, USA	Isle de Jean Charles, USA	Jakarta, Indonesia	Keta Lagoon, Ghana	Konkan region, India	La Manga del Mar Menor, Spain	Lagos, Nigeria	London, UK	Male’, Maldives	Mekong Delta, Vietnam	Mendocino County, USA	Metrop. Lima, Peru	Metrop. Miami , USA	Montevideo, Uruguay	Mumbai, India	Nile delta, Egypt	North-East Norfolk, UK	Pointe-à-Pitre, France	Port-Louis, Mauritius	Prudhoe Bay, USA	Puri region, India	Rangiroa, French Polynesia	Rotterdam, Netherlands
1. Does scientifically-based knowledge on current and future climate risks exist at the appropriate scale?	1.1. Are current climate-related coastal hazards known?	3	2	2	1	4	4	3	2	3	2	2	3	3	3	4	2	1	2	2	3	3	4	3	3	4	4	4	4	1	3	4	2	4	3	5	3	3	4	4	3	3	4	3	3	2	3	3	4
	1.2. Are current drivers of exposure and vulnerability of natural systems known?	4	1	2	2	4	3	3	2	3	1	2	3	2	1	4	3	3	NA	2	2	3	3	4	3	3	4	4	3	1	4	4	2	3	3	3	3	2	4	4	3	2	3	4	2	2	4	3	2
	1.3. Are current drivers of exposure and vulnerability of human systems known?	4	1	2	1	4	3	3	2	3	3	2	4	2	3	4	3	4	3	2	3	3	4	2	4	4	2	4	3	1	3	4	2	4	4	3	3	4	4	4	3	1	4	3	3	0	3	3	4
	1.4. Are future climate risks projected (at a relevant/useful scale)?	0	1	0	2	4	3	3	2	3	1	2	3	3	1	4	1	3	3	2	3	4	3	3	3	3	2	4	4	0	3	3	1	4	2	4	3	3	4	3	3	3	4	1	2	1	3	1	4
	Median scores	3.5	1	2	1.5	4	3	3	2	3	1.5	2	3	2.5	2	4	2.5	3	3	2	3	3	3.5	3	3	3.5	3	4	3.5	1	3	4	2	4	3	3.5	3	3	4	4	3	2.5	4	3	2.5	1.5	3	3	4
2. Are there adaptation-related plans in place and implemented locally?	2.1 Are there adaptation-related planning tools having concrete implications locally?	1	2	1	1	3	1	1	1	1	2	1	3	4	3	3	2	2	2	1	4	3	1	4	3	3	2	2	3	1	2	4	2	4	2	3	1	3	3	2	3	1	3	1	2	0	3	2	4
	2.2. Are locally-relevant adaptation plans implemented?	0	3	1	1	2	1	1	1	1	NA	1	2	2	1	3	0	1	NA	1	3	1	1	3	3	3	2	3	2	0	2	2	1	4	2	2	1	1	2	2	2	NA	3	1	1	0	2	0	3
	2.3. Are the main non-state actors contributing to the design and implementation of locally-relevant local plans/policies?	NA	4	3	1	4	2	2	2	2	3	1	3	3	3	3	2	2	3	1	4	3	2	4	4	4	4	4	1	0	2	4	2	4	1	2	2	4	3	3	3	NA	3	1	2	0	2	2	3
	Median scores	0.5	3	1	1	3	1	1	1	1	2.5	1	3	3	3	3	2	2	2.5	1	4	3	1	4	3	3	2	3	2	0	2	4	2	4	2	2	1	3	3	2	3	1	3	1	2	0	2	2	3
3. Are adequate actions taking place at a relevant scale to reduce coastal climate risks?	3.1 Are there actions targeting prominent climate hazards?	NA	1	2	1	4	3	3	2	2	4	1	3	2	2	4	1	2	NA	2	2	2	3	3	2	2	3	3	2	2	2	4	1	4	3	3	1	2	3	1	1	2	4	1	3	0	3	2	4
	3.2. Are there actions addressing the main drivers of coastal natural systems’ exposure & vulnerability?	2	2	2	1	2	1	2	1	2	3	2	1	2	1	3	2	3	NA	2	3	2	2	3	1	2	1	4	0	2	2	3	1	3	0	1	2	2	2	2	2	1	3	1	1	0	2	0	2
	3.3. Are there actions addressing the main drivers of coastal human systems’ exposure & vulnerability?	1	2	2	2	2	2	3	2	2	3	0	2	2	2	3	1	2	NA	2	2	2	3	3	2	3	2	4	1	1	2	4	1	3	3	3	1	3	3	4	1	1	3	1	2	0	3	1	4
	Median scores	1.5	2	2	1	2	2	3	2	2	3	1	2	2	2	3	1	2		2	2	2	3	3	2	2	2	4	1	2	2	4	1	3	3	3	1	2	3	2	1	1	3	1	2	0	3	1	4
4. Are there sufficient cross-scale institutional, human and financial capacities to implement adaptation locally?	4.1. Are there governance arrangements in place to support institutional capacities to coordinate adaptation activities locally (multi-scale governance and mainstreaming across policy areas/sectoral plans)?	0	2	2	2	3	3	2	1	2	NA	1	2	4	3	4	1	3	3	1	3	2	2	4	3	4	3	4	3	1	2	4	2	3	2	2	2	NA	3	4	3	1	3	3	2	2	3	1	4
	4.2. Are there enough human capacities in place at the relevant scale (primarily locally, but also nationally)?	NA	2	2	2	1	3	3	2	3	1	NA	2	3	1	4	1	2	2	1	3	2	3	3	3	NA	3	4	3	1	3	1	0	3	2	2	1	2	3	3	2	2	3	2	1	1	2	1	3
	4.3. Is specific and sustainable funding available at the case study scale that is specifically dedicated to managing climate-related coastal risk and adaptation?	0	1	0	3	2	2	3	3	3	0	NA	NA	1	1	3	0	3	NA	1	2	2	3	2	2	NA	2	3	NA	0	2	1	1	4	2	NA	2	1	3	2	2	NA	3	2	2	0	3	0	4
	Median scores	0	2	2	2	2	3	3	2	3	0.5	1	2	3	1	4	1	3	2.5	1	3	2	3	3	3	4	3	4	3	1	2	1	1	3	2	2	2	1.5	3	3	2	1.5	3	2	2	1	3	1	4
5. Is there evidence on effective reduction of current and projected coastal climate risk (including reducing hazards locally and managing long-term exposure and vulnerability)?	5.1. Is there evidence of risk reduction today?	0	0	1	2	2	2	3	2	2	0	0	1	1	0	3	1	2	0	0	2	2	3	1	2	2	2	3	1	0	1	1	1	4	3	1	1	1	2	2	NA	1	4	1	1	0	3	1	4
	5.2. Are there indications that the policies and actions implemented at the case study scale contribute to minimize the risk of maladaptation in the long run?	0	1	0	1	NA	2	2	2	2	3	0	0	0	0	3	0	1	0	1	1	1	2	4	2	2	2	3	1	0	1	NA	1	2	1	0	1	0	2	1	1	0	2	0	1	0	1	0	3
	5.3. Are there indications that the society (at the case study scale) is aware of the need to tackle both current and future coastal climate risks?	1	2	1	3	3	3	3	2	3	3	2	2	2	4	3	2	3	4	0	2	4	3	2	3	3	3	4	3	1	3	3	2	4	3	1	2	4	3	3	3	1	4	3	2	2	3	2	2
	Median scores	0	1	1	2	2.5	2	3	2	2	3	0	1	1	0	3	1	2	0	0	2	2	3	2	2	2	2	3	1	0	1	2	1	4	3	1	1	1	2	2	2	1	4	1	1	0	3	1	3
6. Is a pathway-like approach considered?	6.1. Are locally-relevant adaptation goals established in the short-, medium- and long-term (respectively <10 years, 1-3 decades, more), and articulated with each other (i.e. how does reaching present-day goals support reaching longer-term ones)?	1	2	0	4	4	2	4	4	4	1	1	1	1	3	3	2	4	0	0	1	2	4	3	4	4	2	4	2	0	2	4	2	4	1	1	1	3	4	3	2	1	4	1	0	0	2	0	4
	6.2. Are synergies and trade-offs (now and over time) between various adaptation-related options considered?	1	2	1	1	3	1	3	3	3	0	0	0	1	0	3	2	2	1	NA	1	2	3	3	4	2	1	3	1	NA	2	4	NA	3	0	0	1	1	3	2	1	0	3	1	0	0	1	0	4
	6.3. Are options planned in a sequenced manner and alternative strategies at the case study level?	1	2	0	1	1	3	2	2	2	1	0	1	0	1	2	0	1	0	NA	0	1	2	3	3	2	1	2	1	0	1	4	0	4	0	1	0	1	2	NA	1	0	2	0	0	0	1	0	4
	Median scores	1	2	0	1	3	2	3	3	3	1	0	1	1	1	3	2	2	0	0	1	2	3	3	4	2	1	3	1	0	2	4	1	4	0	1	1	1	3	2.5	1	0	3	1	0	0	1	0	4
	Aggregated median score	1	2	1	1	3	2	3	2	2	2	1	2	2	1	3	1	2	2	1	2	2	3	3	3	3	2	4	2	1	2	4	1	4	2	2	1	2	3	3	2	1	3	1	2	0	3	1	4
	Aggregated score per local case study	19	33	24	32	52	44	49	38	46	31	18	36	38	33	63	26	44	23	21	44	44	51	57	54	50	45	66	38	12	42	58	24	68	37	37	31	40	57	49	39	20	62	30	30	10	47	22	66
	Median scores	0	0.5	1	1.5	2	2.5	3	3.5	4		NA
Whole sample, all questions	Number of local case studies	1	0	16	0	24	1	15	0	4	61
	% of the sample	1.63934	0	26.2295	0	39.3443	1.63934	24.5902	0	6.55738	100
1. Does scientifically-based knowledge on current and future climate risks exist at the appropriate scale?	Number of local case studies	0	0	2	4	8	6	23	6	12	61	0
	% of the sample	0	0	3.27869	6.55738	13.1148	9.83607	37.7049	9.83607	19.6721	100
2. Are there adaptation-related plans in place and implemented locally?	Number of local case studies	2	1	15	0	17	3	19	0	4	61	0
	% of the sample	3.27869	1.63934	24.5902	0	27.8689	4.91803	31.1475	0	6.55738	100
3. Are adequate actions taking place at a relevant scale to reduce coastal climate risks?	Number of local case studies	1	0	14	1	25	1	14	0	4	60	1
	% of the sample	1.66667	0	23.3333	1.66667	41.6667	1.66667	23.3333	0	6.66667	100
4. Are there sufficient cross-scale institutional, human and financial capacities to implement adaptation locally?	Number of local case studies	1	1	15	2	16	1	21	0	4	61	0
	% of the sample	1.63934	1.63934	24.5902	3.27869	26.2295	1.63934	34.4262	0	6.55738	100
5. Is there evidence on effective reduction of current and projected coastal climate risk (including reducing hazards locally and managing long-term exposure and vulnerability)?	Number of local case studies	11	0	19	0	18	2	8	0	3	61	0
	% of the sample	18.0328	0	31.1475	0	29.5082	3.27869	13.1148	0	4.91803	100
6. Is a pathway-like approach considered?	Number of local case studies	14	0	22	0	8	1	12	0	4	61	0
	% of the sample	22.9508	0	36.0656	0	13.1148	1.63934	19.6721	0	6.55738	100
CONFIDENCE LEVELS
		EUR	ANO	SMI	ACS	EUR	ANZ	ANZ	ANZ	ANZ	ACS	ANO	ASI	AFR	ACS	ANO	ACS	ACS	EUR	AFR	AFR	ASI	ANZ	ANO	ANZ	EUR	SMI	ANO	ASI	AFR	ASI	EUR	AFR	EUR	SMI	ASI	ANO	ACS	ANO	ACS	ASI	AFR	EUR	SMI	SMI	ANO	ASI	SMI	EUR
Guiding questions		A3	A2	A3	A4	A3	A1	A2	A4	A3	A4	A3	A2	A1	A2	A2	A3	A3	A2	A1	A2	A4	A1	A2	A2	A1	A1	A4	A1	A3	A3	A1	A1	A1	A1	A3	A3	A1	A1	A1	A1	A3	A2	A1	A1	A3	A2	A2	A1
		Aland islands, Finland	Anchorage, USA	Anguilla Island	Artemisa, Cuba	Asturias, Spain	Auckland, New Zealand	Bunbury, Australia	Burketown, Australia	Byron Bay, Australia	Cahuita, Costa Rica	Cancun, Mexico	Can Tho Citiy, Vietnam	Cape Town, South Africa	Cartagena de Indias, Colombia	Charleston, USA	Cienaga Gr. de Sant. M., Colombia	Colon province, Panama	Cork, Ireland	Douala, Cameroon	Durban, South Africa	Ghoramara, India	Gold Coast, Australia	Halifax, Canada	Hawke’s Bay, New Zealand	Helsinki, Finland	Honolulu, USA	Isle de Jean Charles, USA	Jakarta, Indonesia	Keta Lagoon, Ghana	Konkan region, India	La Manga del Mar Menor, Spain	Lagos, Nigeria	London, UK	Male’, Maldives	Mekong Delta, Vietnam	Mendocino County, USA	Metrop. Lima, Peru	Metrop. Miami , USA	Montevideo, Uruguay	Mumbai, India	Nile delta, Egypt	North-East Norfolk, UK	Pointe-à-Pitre, France	Port-Louis, Mauritius	Prudhoe Bay, USA	Puri region, India	Rangiroa, French Polynesia	Rotterdam, Netherlands
	Median aggregated confidence levels	2	2	3	3	3	3	2	2	2	2	2	2	2	3	3	2	3	3	2	2	3	2	3	3	3	3	3	2	2	2	2	2	3	3	2	3	2	3	3	2	1	3	3	2	2	2	3	3
		CL 1	CL 2	CL 3
	TOTAL SAMPLE — Number of cases	3	27	31
	%	4.91803	44.2623	50.8197
	AFRICA	3	5	2		10
		30	50	20
	AMERICA NORTH	0	3	8		11
		0	27.2727	72.7273
	AMERICA CENTRAL & SOUTH	0	4	5		9
		0	44.4444	55.5556
	ASIA	0	6	1		7
		0	85.7143	14.2857
	AUSTRALIA & NEW ZEALAND	0	4	3		7
		0	57.1429	42.8571
	EUROPE	0	4	6		10
		0	40	60
	SMALL ISLANDS	0	1	6		7
		0	14.2857	85.7143
[truncated: 13 more columns]

## Sheet: 5a. Assessment archetype A1 (
Coastal Archetype A1 - Urban coastal areas with relatively high population and asset densities
Assessment ROUNDS 1 and 2 (Oct. 2022, Jan. 2023)
GAP-Track_Expert judgment assessment grid _ALL REGIONS_All experts
Adaptation Challenge considered: coastal adaptation
Some further guidance: - Guidance on scope and scale is included (italics) for each sub-question - NA (Not Assessed) applies when the experts are not able to score, e.g; because they don’t know is information is available. Score 0 applies when experts know that information doesn’t exist.
SCORES
Guiding questions			Africa				America North			America Central & South			Asia			Australia & New Zealand			Europe					Small Islands					Aggregated scores
		Median score across regions	Cape Town, South Africa	Lagos, Nigeria	Douala, Cameroon	Median score	Metrop. Miami , USA	Vancouver, Canada	Median score	Metrop. Lima, Peru	Montevideo, Uruguay	Median score	Jakarta, Indonesia	Mumbai, India	Median score	Auckland, New Zealand	Gold Coast, Australia	Median score	Helsinki, Finland	La Manga del Mar Menor (Spain)	London, UK	Rotterdam, Netherlands	Median score	Honolulu, USA	Male’ (Maldives)	Pointe-à-Pitre (France)	Port-Louis, Mauritius	Median score
1. Does scientifically-based knowledge on current and future climate risks exist at the appropriate scale?	1.1. Are current climate-related coastal hazards known?	4	3	2	2	2	4	4	4	3	4	3.5	4	3	3.5	4	4	4	4	4	4	4	4	4	3	3	3	3	66
	1.2. Are current drivers of exposure and vulnerability of natural systems known?	3	2	2	2	2	4	4	4	2	4	3	3	3	3	3	3	3	3	4	3	2	3	4	3	4	2	3.5	57
	1.3. Are current drivers of exposure and vulnerability of human systems known?	3	2	2	2	2	4	3	3.5	4	4	4	3	3	3	3	4	3.5	4	4	4	4	4	2	4	3	3	3	62
	1.4. Are future climate risks projected (at a relevant/useful scale)?	3	3	1	2	2	4	3	3.5	3	3	3	4	3	3.5	3	3	3	3	3	4	4	3.5	2	2	1	2	2	53
2. Are there adaptation-related plans in place and implemented locally?	2.1 Are there adaptation-related planning tools having concrete implications locally?	3	4	2	1	2	3	3	3	3	2	2.5	3	3	3	1	1	1	3	4	4	4	4	2	2	1	2	2	48
	2.2. Are locally-relevant adaptation plans implemented?	2	2	1	1	1	2	3	2.5	1	2	1.5	2	2	2	1	1	1	3	2	4	3	3	2	2	1	1	1.5	36
	2.3. Are the main non-state actors contributing to the design and implementation of locally-relevant local plans/policies?	3	3	2	1	2	3	3	3	4	3	3.5	1	3	2	2	2	2	4	4	4	3	4	4	1	1	2	1.5	50
3. Are adequate actions taking place at a relevant scale to reduce coastal climate risks?	3.1 Are there actions targeting prominent climate hazards?	3	2	1	2	2	3	3	3	2	1	1.5	2	1	1.5	3	3	3	2	4	4	4	4	3	3	1	3	3	47
	3.2. Are there actions addressing the main drivers of coastal natural systems’ exposure & vulnerability?	2	2	1	2	2	2	n/a	2	2	2	2	0	2	1	1	2	1.5	2	3	3	2	2.5	1	0	1	1	1	29
	3.3. Are there actions addressing the main drivers of coastal human systems’ exposure & vulnerability?	3	2	1	2	2	3	3	3	3	4	3.5	1	1	1	2	3	2.5	3	4	3	4	3.5	2	3	1	2	2	47
4. Are there sufficient cross-scale institutional, human and financial capacities to implement adaptation locally?	4.1. Are there governance arrangements in place to support institutional capacities to coordinate adaptation activities locally (multi-scale governance and mainstreaming across policy areas/sectoral plans)?	3	4	2	1	2	3	3	3	NA	4	4	3	3	3	3	2	2.5	4	4	3	4	4	3	2	3	2	2.5	53
	4.2. Are there enough human capacities in place at the relevant scale (primarily locally, but also nationally)?	3	3	0	1	1	3	3	3	2	3	2.5	3	2	2.5	3	3	3	NA	1	3	3	3	3	2	2	1	2	41
	4.3. Is specific and sustainable funding available at the case study scale that is specifically dedicated to managing climate-related coastal risk and adaptation?	2	1	1	1	1	3	2	2.5	1	2	1.5	NA	2	2	2	3	2.5	NA	1	4	4	4	2	2	2	2	2	35
5. Is there evidence on effective reduction of current and projected coastal climate risk (including reducing hazards locally and managing long-term exposure and vulnerability)?	5.1. Is there evidence of risk reduction today?	2	1	1	0	1	2	2	2	1	2	1.5	1	NA	1	2	3	2.5	2	1	4	4	3	2	3	1	1	1.5	33
	5.2. Are there indications that the policies and actions implemented at the case study scale contribute to minimize the risk of maladaptation in the long run?	1	0	1	1	1	2	3	2.5	0	1	0.5	1	1	1	2	2	2	2	NA	2	3	2	2	1	0	1	1	25
	5.3. Are there indications that the society (at the case study scale) is aware of the need to tackle both current and future coastal climate risks?	3	2	2	0	2	3	3	3	4	3	3.5	3	3	3	3	3	3	3	3	4	2	3	3	3	3	2	3	52
6. Is a pathway-like approach considered?	6.1. Are locally-relevant adaptation goals established in the short-, medium- and long-term (respectively <10 years, 1-3 decades, more), and articulated with each other (i.e. how does reaching present-day goals support reaching longer-term ones)?	2	1	2	0	1	4	3	3.5	3	3	3	2	2	2	2	4	3	4	4	4	4	4	2	1	1	0	1	46
	6.2. Are synergies and trade-offs (now and over time) between various adaptation-related options considered?	1	1	NA	NA	1	3	2	2.5	1	2	1.5	1	1	1	1	3	2	2	4	3	4	3.5	1	0	1	0	0.5	30
	6.3. Are options planned in a sequenced manner and alternative strategies at the case study level?	1	0	0	NA	0	2	2	2	1	NA	1	1	1	1	3	2	2.5	2	4	4	4	4	1	0	0	0	0	27
Median scores		2	2	1	1	2	3	3	3	2	3	2.5	2	2	2	2	3	3	3	4	4	4	4	2	2	1	2	2
Aggregated scores	Per local case study		38	24	21		57	52		40	49		38	39		44	51		50	58	68	66		45	37	30	30		837
	Per region		83				109			89			77			95			242					142
	Archetype 1	837
CONFIDENCE LEVELS
Assessment (Low, Medium High)			Africa				America North			America Central & South			Asia			Australia & New Zealand			Europe					Small Islands					Aggregated scores
Guiding questions		Median score across regions	Cape Town, South Africa	Lagos, Nigeria	Douala, Cameroon	Median score	Metrop. Miami , USA	Vancouver, Canada	Median score	Metrop. Lima, Peru	Montevideo, Uruguay	Median score	Jakarta, Indonesia	Mumbai, India	Median score	Auckland, New Zealand	Gold Coast, Australia	Median score	Helsinki, Finland	La Manga del Mar Menor (Spain)	London, UK	Rotterdam, Netherlands	Median score	Honolulu, USA	Male’ (Maldives)	Pointe-à-Pitre (France)	Port-Louis, Mauritius	Median score
1. Does scientifically-based knowledge on current and future climate risks exist at the appropriate scale?	1.1. Are current climate-related coastal hazards known?	/	High	High	Medium	/	High	High	/	Medium	High	/	High	Medium	/	High	High	/	High	High	High	High	/	High	High	High	High	/
	1.2. Are current drivers of exposure and vulnerability of natural systems known?	/	High	High	Medium	/	High	High	/	Medium	High	/	Medium	High	/	Medium	High	/	High	High	High	Medium	/	High	High	High	High	/
	1.3. Are current drivers of exposure and vulnerability of human systems known?	/	Medium	High	Medium	/	High	High	/	Medium	High	/	Medium	Medium	/	High	Medium	/	High	HIgh	High	High	/	High	High	High	High	/
	1.4. Are future climate risks projected (at a relevant/useful scale)?	/	High	Medium	Medium	/	High	High	/	Medium	High	/	Medium	Medium	/	High	High	/	High	High	High	High	/	High	High	High	Medium	/
2. Are there adaptation-related plans in place and implemented locally?	2.1 Are there adaptation-related planning tools having concrete implications locally?	/	HIgh	HIgh	Medium	/	High	High	/	High	High	/	Medium	Medium	/	High	High	/	High	High	High	High	/	High	High	High	Medium	/
	2.2. Are locally-relevant adaptation plans implemented?	/	Medium	Medium	Medium	/	High	High	/	High	High	/	Medium	High	/	High	Medium	/	High	High	High	High	/	High	High	High	Low	/
	2.3. Are the main non-state actors contributing to the design and implementation of locally-relevant local plans/policies?	/	High	Medium	Medium	/	High	High	/	High	Medium	/	Medium	Medium	/	High	Medium	/	High	High	High	High	/	High	High	High	Low	/
3. Are adequate actions taking place at a relevant scale to reduce coastal climate risks?	3.1 Are there actions targeting prominent climate hazards?	/	Medium	Medium	Medium	/	High	High	/	High	High	/	High	High	/	High	High	/	High	High	High	High	/	High	High	High	High	/
	3.2. Are there actions addressing the main drivers of coastal natural systems’ exposure & vulnerability?	/	Low	Medium	Medium	/	Hgh	A priori, not to be assessed at the individual expert level	/	Medium	Medium	/	Medium	Medium	/	Medium	Medium	/	Medium	High	Medium	High	/	High	High	High	Low	/
	3.3. Are there actions addressing the main drivers of coastal human systems’ exposure & vulnerability?	/	Low	Medium	Medium	/	HIgh	HIgh	/	Medium	Low	/	High	High	/	Medium	Medium	/	High	Medium	High	High	/	High	High	High	HIgh	/
4. Are there sufficient cross-scale institutional, human and financial capacities to implement adaptation locally?	4.1. Are there governance arrangements in place to support institutional capacities to coordinate adaptation activities locally (multi-scale governance and mainstreaming across policy areas/sectoral plans)?	/	High	Medium	Medium	/	High	High	/	NA	High	/	Medium	High	/	Medium	Medium	/	High	Medium	High	High	/	High	High	High	Low	/
	4.2. Are there enough human capacities in place at the relevant scale (primarily locally, but also nationally)?	/	Medium	Medium	Low	/	High	Medium	/	Medium	Medium	/	Medium	Medium	/	High	High	/	Low	Low	High	High	/	Medium	Medium	High	Medium	/
	4.3. Is specific and sustainable funding available at the case study scale that is specifically dedicated to managing climate-related coastal risk and adaptation?	/	Low	Medium	Medium	/	High	Low	/	Medium	High	/	Low	Medium	/	Medium	High	/	Low	Medium	High	High	/	Low	Medium	High	Low	/
5. Is there evidence on effective reduction of current and projected coastal climate risk (including reducing hazards locally and managing long-term exposure and vulnerability)?	5.1. Is there evidence of risk reduction today?	/	Low	Low	Low	/	High	Low	/	Medium	Medium	/	Medium	Medium	/	High	Medium	/	Low	Medium	High	High	/	Medium	High	High	Medium	/
	5.2. Are there indications that the policies and actions implemented at the case study scale contribute to minimize the risk of maladaptation in the long run?	/	Low	Low	Low	/	High	Medium	/	Medium	High	/	Medium	Low	/	Medium	Low	/	Medium	Low	High	High	/	Medium	Medium	Medium	Low	/
	5.3. Are there indications that the society (at the case study scale) is aware of the need to tackle both current and future coastal climate risks?	/	Low	Low	Low	/	High	Medium	/	High	Medium	/	Medium	High	/	High	Low	/	Low	Medium	High	Medium	/	High	Medium	Medium	Medium	/
6. Is a pathway-like approach considered?	6.1. Are locally-relevant adaptation goals established in the short-, medium- and long-term (respectively <10 years, 1-3 decades, more), and articulated with each other (i.e. how does reaching present-day goals support reaching longer-term ones)?	/	Medium	Medium	Medium	/	High	High	/	Low	High	/	Medium	Medium	/	High	High	/	High	High	High	High	/	High	Medium	Medium	Low	/
	6.2. Are synergies and trade-offs (now and over time) between various adaptation-related options considered?	/	Medium	NA	NA	/	High	High	/	Medium	Medium	/	Low	Medium	/	Medium	Medium	/	Medium	Medium	Medium	High	/	Medium	High	High	Low	/
	6.3. Are options planned in a sequenced manner and alternative strategies at the case study level?	/	Low	Medium	NA	/	High	High	/	Medium	NA	/	Low	Medium	/	High	Medium	/	Medium	Medium	High	High	/	Medium	Medium	High	Low	/
Scoring for confidence levels			Africa				America North			America Central & South			Asia			Australia & New Zealand			Europe					Small Islands
1. Does scientifically-based knowledge on current and future climate risks exist at the appropriate scale?	1.1. Are current climate-related coastal hazards known?	3	3	3	2	3	3	3	3	2	3	2.5	3	2	2.5	3	3	3	3	3	3	3	3	3	3	3	3	3	54
	1.2. Are current drivers of exposure and vulnerability of natural systems known?	3	3	3	2	3	3	3	3	2	3	2.5	2	3	2.5	2	3	2.5	3	0	3	2	2.5	3	3	3	3	3	49
	1.3. Are current drivers of exposure and vulnerability of human systems known?	3	2	3	2	2	3	3	3	2	3	2.5	2	2	2	3	2	2.5	3	3	3	3	3	3	3	3	3	3	51
	1.4. Are future climate risks projected (at a relevant/useful scale)?	3	3	2	2	2	3	3	3	2	3	2.5	2	2	2	3	3	3	3	0	3	3	3	3	3	3	2	3	48
2. Are there adaptation-related plans in place and implemented locally?	2.1 Are there adaptation-related planning tools having concrete implications locally?	3	3	3	2	3	3	3	3	3	3	3	2	2	2	3	3	3	3	0	3	3	3	3	3	3	2	3	50
	2.2. Are locally-relevant adaptation plans implemented?	3	2	2	2	2	3	3	3	3	3	3	2	3	2.5	3	2	2.5	3	0	3	3	3	3	3	3	1	3	47
	2.3. Are the main non-state actors contributing to the design and implementation of locally-relevant local plans/policies?	3	3	2	2	2	3	3	3	3	2	2.5	2	2	2	3	2	2.5	3	3	3	3	3	3	3	3	1	3	49
3. Are adequate actions taking place at a relevant scale to reduce coastal climate risks?	3.1 Are there actions targeting prominent climate hazards?	3	2	2	2	2	3	3	3	3	3	3	3	3	3	3	3	3	3	3	3	3	3	3	3	3	3	3	54
	3.2. Are there actions addressing the main drivers of coastal natural systems’ exposure & vulnerability?	2	1	2	2	2	0	0	0	2	2	2	2	2	2	2	2	2	2	3	2	3	2.5	3	3	3	1	3	37
	3.3. Are there actions addressing the main drivers of coastal human systems’ exposure & vulnerability?	3	1	2	2	2	3	3	3	2	1	1.5	3	3	3	2	2	2	3	2	3	3	3	3	3	3	3	3	47
4. Are there sufficient cross-scale institutional, human and financial capacities to implement adaptation locally?	4.1. Are there governance arrangements in place to support institutional capacities to coordinate adaptation activities locally (multi-scale governance and mainstreaming across policy areas/sectoral plans)?	3	3	2	2	2	3	3	3	0	3	1.5	2	3	2.5	2	2	2	3	2	3	3	3	3	3	3	1	3	46
	4.2. Are there enough human capacities in place at the relevant scale (primarily locally, but also nationally)?	2	2	2	1	2	3	2	2.5	2	2	2	2	2	2	3	3	3	1	1	3	3	2	2	2	3	2	2	41
	4.3. Is specific and sustainable funding available at the case study scale that is specifically dedicated to managing climate-related coastal risk and adaptation?	2	1	2	2	2	3	1	2	2	3	2.5	1	2	1.5	2	3	2.5	1	2	3	3	2.5	1	2	3	1	1.5	38
5. Is there evidence on effective reduction of current and projected coastal climate risk (including reducing hazards locally and managing long-term exposure and vulnerability)?	5.1. Is there evidence of risk reduction today?	2	1	1	1	1	3	1	2	2	2	2	2	2	2	3	2	2.5	1	2	3	3	2.5	2	3	3	2	2.5	39
	5.2. Are there indications that the policies and actions implemented at the case study scale contribute to minimize the risk of maladaptation in the long run?	2	1	1	1	1	3	2	2.5	2	3	2.5	2	1	1.5	2	1	1.5	2	1	3	3	2.5	2	2	2	1	2	35
	5.3. Are there indications that the society (at the case study scale) is aware of the need to tackle both current and future coastal climate risks?	2	1	1	1	1	3	2	2.5	3	2	2.5	2	3	2.5	3	1	2	1	2	3	2	2	3	2	2	2	2	39
6. Is a pathway-like approach considered?	6.1. Are locally-relevant adaptation goals established in the short-, medium- and long-term (respectively <10 years, 1-3 decades, more), and articulated with each other (i.e. how does reaching present-day goals support reaching longer-term ones)?	3	2	2	2	2	3	3	3	1	3	2	2	2	2	3	3	3	3	3	3	3	3	3	2	2	1	2	46
	6.2. Are synergies and trade-offs (now and over time) between various adaptation-related options considered?	2	2	0	0	0	3	3	3	2	2	2	1	2	1.5	2	2	2	2	2	2	3	2	2	3	3	1	2.5	37
	6.3. Are options planned in a sequenced manner and alternative strategies at the case study level?	2	1	2	0	1	3	3	3	2	0	1	1	2	1.5	3	2	2.5	2	2	3	3	2.5	2	2	3	1	2	37
Median aggregated confidence levels		3	2	2	2	2	3	3	3	2	3	2	2	2	2	3	2	3	3	2	3	3	3	3	3	3	2	3
Aggregated scores	Per local case study		37	37	30		54	47		40	46		38	43		50	44		45	34	55	55		50	51	54	34		844
	Per region		104				101			86			81			94			189					189
	Archetype 1	844

## Sheet: 5b. Assessment archetype A2 (
Coastal Archetype A2 - Urban coastal areas with relatively lower population and asset densities
Assessment ROUNDS 1 and 2 (Oct. 2022, Jan. 2023)
GAP-Track_Expert judgment assessment grid _ALL REGIONS_All experts
Adaptation Challenge considered: coastal adaptation
Some further guidance: - Guidance on scope and scale is included (italics) for each sub-question - NA (Not Assessed) applies when the experts are not able to score, e.g; because they don’t know is information is available. Score 0 applies when experts know that information doesn’t exist.
SCORES
Guiding questions			Africa				America North				America Central & South			Asia			Australia & New Zealand			Europe			Small Islands		Aggregated scores
		Median score across regions	Durban, South Africa	Saint-Louis, Senegal	Several cities in Mozamb.	Median score	Anchorage, USA	Charleston, USA	Halifax, Canada	Median score	Cartagena de Indias, Colombia	Valparaiso, Chile	Median score	Can Tho Citiy, Vietnam	Puri region, India	Median score	Bunbury, Australia	Hawke’s Bay, New Zealand	Median score	Cork, Ireland	North-East Norfolk, UK	Median score	Rangiroa, French Polynesia	Median score
1. Does scientifically-based knowledge on current and future climate risks exist at the appropriate scale?	1.1. Are current climate-related coastal hazards known?	3	3	3	3	3	2	4	3	3	3	3	3	3	3	3	3	3	3	2	4	3	3	3	45
	1.2. Are current drivers of exposure and vulnerability of natural systems known?	3	2	2	2	2	1	4	4	4	1	3	2	3	4	3.5	3	3	3	NA	3	3	3	3	38
	1.3. Are current drivers of exposure and vulnerability of human systems known?	3	3	2	3	3	1	4	2	2	3	4	3.5	4	3	3.5	3	4	3.5	3	4	3.5	3	3	46
	1.4. Are future climate risks projected (at a relevant/useful scale)?	3	3	1	2	2	1	4	3	3	1	3	2	3	3	3	3	3	3	3	4	3.5	1	1	38
2. Are there adaptation-related plans in place and implemented locally?	2.1 Are there adaptation-related planning tools having concrete implications locally?	3	4	2	2	2	2	3	4	3	3	2	2.5	3	3	3	1	3	2	2	3	2.5	2	2	39
	2.2. Are locally-relevant adaptation plans implemented?	2	3	1	2	2	3	3	3	3	1	2	1.5	2	2	2	1	3	2	NA	3	3	0	0	29
	2.3. Are the main non-state actors contributing to the design and implementation of locally-relevant local plans/policies?	3	4	2	2	2	4	3	4	4	3	3	3	3	2	2.5	2	4	3	3	3	3	2	2	44
3. Are adequate actions taking place at a relevant scale to reduce coastal climate risks?	3.1 Are there actions targeting prominent climate hazards?	2	2	2	2	2	1	4	3	3	2	2	2	3	3	3	3	2	2.5	NA	4	4	2	2	35
	3.2. Are there actions addressing the main drivers of coastal natural systems’ exposure & vulnerability?	2	3	2	1	2	2	3	3	3	1	2	1.5	1	2	1.5	2	1	1.5	NA	3	3	0	0	26
	3.3. Are there actions addressing the main drivers of coastal human systems’ exposure & vulnerability?	2	2	2	1	2	2	3	3	3	2	1	1.5	2	3	2.5	3	2	2.5	NA	3	3	1	1	30
4. Are there sufficient cross-scale institutional, human and financial capacities to implement adaptation locally?	4.1. Are there governance arrangements in place to support institutional capacities to coordinate adaptation activities locally (multi-scale governance and mainstreaming across policy areas/sectoral plans)?	3	3	2	1	2	2	4	4	4	3	3	3	2	3	2.5	2	3	2.5	3	3	3	1	1	39
	4.2. Are there enough human capacities in place at the relevant scale (primarily locally, but also nationally)?	2	3	1	2	2	2	4	3	3	1	3	2	2	2	2	3	3	3	2	3	2.5	1	1	35
	4.3. Is specific and sustainable funding available at the case study scale that is specifically dedicated to managing climate-related coastal risk and adaptation?	2	2	1	0	1	1	3	2	2	1	2	1.5	NA	3	3	3	2	2.5	NA	3	3	0	0	23
5. Is there evidence on effective reduction of current and projected coastal climate risk (including reducing hazards locally and managing long-term exposure and vulnerability)?	5.1. Is there evidence of risk reduction today?	1	2	0	1	1	0	3	1	1	0	2	1	1	3	2	3	2	2.5	0	4	2	1	1	23
	5.2. Are there indications that the policies and actions implemented at the case study scale contribute to minimize the risk of maladaptation in the long run?	1	1	2	1	1	1	3	4	3	0	1	0.5	0	1	0.5	2	2	2	0	2	1	0	0	20
	5.3. Are there indications that the society (at the case study scale) is aware of the need to tackle both current and future coastal climate risks?	3	2	0	2	2	2	3	2	2	4	3	3.5	2	3	2.5	3	3	3	4	4	4	2	2	39
6. Is a pathway-like approach considered?	6.1. Are locally-relevant adaptation goals established in the short-, medium- and long-term (respectively <10 years, 1-3 decades, more), and articulated with each other (i.e. how does reaching present-day goals support reaching longer-term ones)?	2	1	1	2	1	2	3	3	3	3	2	2.5	1	2	1.5	4	4	4	0	4	2	0	0	32
	6.2. Are synergies and trade-offs (now and over time) between various adaptation-related options considered?	1	1	NA	0	0.5	2	3	3	3	0	1	0.5	0	1	0.5	3	4	3.5	1	3	2	0	0	22
	6.3. Are options planned in a sequenced manner and alternative strategies at the case study level?	1	0	NA	0	0	2	2	3	2	1	0	0.5	1	1	1	2	3	2.5	0	2	1	0	0	17
Median scores		2	2	2	2	2	2	3	3	3	1	2	2	2	3	2	3	3	3	2	3	3	1	1
Aggregated scores	Per local case study		44	26	29		33	63	57		33	42		36	47		49	54		23	62		22		620
	Per region		99				153				75			83			103			85			22
	Archetype 2	521
CONFIDENCE LEVELS
Assessment (Low, Medium High)			Africa				America North				America Central & South			Asia			Australia & New Zealand			Europe			Small Islands		Aggregated scores
Guiding questions		Median score across regions	Durban, South Africa	Saint-Louis, Senegal	Several cities in Mozamb.	Median score	Anchorage, USA	Charleston, USA	Halifax, Canada	Median score	Cartagena de Indias, Colombia	Valparaiso, Chile	Median score	Can Tho Citiy, Vietnam	Puri region, India	Median score	Bunbury, Australia	Hawke’s Bay, New Zealand	Median score	Cork, Ireland	Norfolk, UK	Median score	Rangiroa, French Polynesia	Median score
1. Does scientifically-based knowledge on current and future climate risks exist at the appropriate scale?	1.1. Are current climate-related coastal hazards known?	/	High	High	Medium	/	High	High	High	/	High	High	/	High	Medium	/	High	High	/	Medium	High	/	High	/
	1.2. Are current drivers of exposure and vulnerability of natural systems known?	/	Medium	Medium	Medium	/	High	High	High	/	Medium	High	/	Medium	High	/	High	Medium	/	Low	High	/	High	/
	1.3. Are current drivers of exposure and vulnerability of human systems known?	/	High	Medium	Medium	/	High	High	High	/	High	Medium	/	Medium	Medium	/	Medium	High	/	High	High	/	High	/
	1.4. Are future climate risks projected (at a relevant/useful scale)?	/	High	Medium	Medium	/	High	High	High	/	High	Medium	/	Medium	High	/	High	High	/	High	High	/	High	/
2. Are there adaptation-related plans in place and implemented locally?	2.1 Are there adaptation-related planning tools having concrete implications locally?	/	High	Medium	Medium	/	High	High	High	/	High	Medium	/	Medium	Medium	/	High	High	/	High	High	/	High	/
	2.2. Are locally-relevant adaptation plans implemented?	/	Medium	Medium	Low	/	High	High	High	/	Medium	Medium	/	Medium	Medium	/	Medium	High	/	Low	High	/	High	/
	2.3. Are the main non-state actors contributing to the design and implementation of locally-relevant local plans/policies?	/	High	Medium	Medium	/	High	High	High	/	Medium	High	/	Medium	Medium	/	Medium	High	/	High	Medium	/	Medium	/
3. Are adequate actions taking place at a relevant scale to reduce coastal climate risks?	3.1 Are there actions targeting prominent climate hazards?	/	High	High	Medium	/	Medium	High	Medium	/	Medium	Medium	/	Medium	High	/	High	Medium	/	Low	High	/	High	/
	3.2. Are there actions addressing the main drivers of coastal natural systems’ exposure & vulnerability?	/	Medium	High	Low	/	Medium	High	Medium	/	Medium	Medium	/	Medium	Medium	/	Medium	Medium	/	Low	High	/	High	/
	3.3. Are there actions addressing the main drivers of coastal human systems’ exposure & vulnerability?	/	Low	High	Low	/	Medium	High	Medium	/	Medium	Low	/	Medium	High	/	Medium	High	/	Low	High	/	High	/
4. Are there sufficient cross-scale institutional, human and financial capacities to implement adaptation locally?	4.1. Are there governance arrangements in place to support institutional capacities to coordinate adaptation activities locally (multi-scale governance and mainstreaming across policy areas/sectoral plans)?	/	High	High	Low	/	Medium	High	Medium	/	Medium	High	/	Medium	Medium	/	Medium	High	/	High	High	/	High	/
	4.2. Are there enough human capacities in place at the relevant scale (primarily locally, but also nationally)?	/	Medium	Medium	Low	/	Low	High	Low	/	High	Medium	/	Low	High	/	High	High	/	High	High	/	Medium	/
	4.3. Is specific and sustainable funding available at the case study scale that is specifically dedicated to managing climate-related coastal risk and adaptation?	/	Low	High	Low	/	Low	Medium	Low	/	Medium	Low	/	Low	Medium	/	High	Medium	/	Low	High	/	Low	/
5. Is there evidence on effective reduction of current and projected coastal climate risk (including reducing hazards locally and managing long-term exposure and vulnerability)?	5.1. Is there evidence of risk reduction today?	/	Medium	High	Medium	/	Low	High	Low	/	High	Low	/	Low	High	/	Medium	Medium	/	High	High	/	High	/
	5.2. Are there indications that the policies and actions implemented at the case study scale contribute to minimize the risk of maladaptation in the long run?	/	Low	High	Low	/	Medium	High	Medium	/	High	Medium	/	Medium	Medium	/	Low	Medium	/	High	High	/	High	/
	5.3. Are there indications that the society (at the case study scale) is aware of the need to tackle both current and future coastal climate risks?	/	Low	High	Low	/	Medium	High	Medium	/	High	Medium	/	Low	High	/	Low	High	/	High	High	/	High	/
6. Is a pathway-like approach considered?	6.1. Are locally-relevant adaptation goals established in the short-, medium- and long-term (respectively <10 years, 1-3 decades, more), and articulated with each other (i.e. how does reaching present-day goals support reaching longer-term ones)?	/	Medium	High	Medium	/	Medium	High	Medium	/	Medium	Medium	/	Medium	Low	/	High	High	/	Medium	High	/	Medium	/
	6.2. Are synergies and trade-offs (now and over time) between various adaptation-related options considered?	/	Low	NA	Low	/	Medium	High	Medium	/	Medium	High	/	Low	Low	/	Medium	High	/	High	High	/	High	/
	6.3. Are options planned in a sequenced manner and alternative strategies at the case study level?	/	Medium	NA	Low	/	Medium	High	Medium	/	Medium	High	/	Low	Low	/	Medium	High	/	High	Medium	/	High	/
Scoring for confidence levels			Africa				America North				America Central & South			Asia			Australia & New Zealand			Europe			Small Islands
1. Does scientifically-based knowledge on current and future climate risks exist at the appropriate scale?	1.1. Are current climate-related coastal hazards known?	3	3	3	2	3	3	3	3	3	3	0	1.5	3	2	2.5	3	3	3	2	3	2.5	3	3	39
	1.2. Are current drivers of exposure and vulnerability of natural systems known?	3	2	2	2	2	3	3	3	3	2	3	2.5	2	3	2.5	3	2	2.5	1	3	2	3	3	37
	1.3. Are current drivers of exposure and vulnerability of human systems known?	3	3	2	2	2	3	3	3	3	3	2	2.5	2	2	2	2	3	2.5	3	3	3	3	3	39
	1.4. Are future climate risks projected (at a relevant/useful scale)?	3	3	2	2	2	3	3	3	3	3	2	2.5	2	3	2.5	3	3	3	3	3	3	3	3	41
2. Are there adaptation-related plans in place and implemented locally?	2.1 Are there adaptation-related planning tools having concrete implications locally?	3	3	2	2	2	3	3	3	3	3	2	2.5	2	2	2	3	3	3	3	3	3	3	3	40
	2.2. Are locally-relevant adaptation plans implemented?	2	2	2	1	2	3	3	3	3	2	2	2	2	2	2	2	3	2.5	1	3	2	3	3	34
	2.3. Are the main non-state actors contributing to the design and implementation of locally-relevant local plans/policies?	2	3	2	2	2	3	3	3	3	2	3	2.5	2	2	2	2	3	2.5	3	2	2.5	2	2	37
3. Are adequate actions taking place at a relevant scale to reduce coastal climate risks?	3.1 Are there actions targeting prominent climate hazards?	2	3	3	2	3	2	3	2	2	2	2	2	2	3	2.5	3	2	2.5	1	3	2	3	3	36
	3.2. Are there actions addressing the main drivers of coastal natural systems’ exposure & vulnerability?	2	2	3	1	2	2	3	2	2	2	2	2	2	2	2	2	2	2	1	3	2	3	3	32
	3.3. Are there actions addressing the main drivers of coastal human systems’ exposure & vulnerability?	2	1	3	1	1	2	3	2	2	2	1	1.5	2	3	2.5	2	3	2.5	1	3	2	3	3	32
4. Are there sufficient cross-scale institutional, human and financial capacities to implement adaptation locally?	4.1. Are there governance arrangements in place to support institutional capacities to coordinate adaptation activities locally (multi-scale governance and mainstreaming across policy areas/sectoral plans)?	3	3	3	1	3	2	3	2	2	2	3	2.5	2	2	2	2	3	2.5	3	3	3	3	3	37
	4.2. Are there enough human capacities in place at the relevant scale (primarily locally, but also nationally)?	2	2	2	1	2	1	3	1	1	3	2	2.5	1	3	2	3	3	3	3	3	3	2	2	33
	4.3. Is specific and sustainable funding available at the case study scale that is specifically dedicated to managing climate-related coastal risk and adaptation?	1	1	3	1	1	1	2	1	1	2	1	1.5	1	2	1.5	3	2	2.5	1	3	2	1	1	25
5. Is there evidence on effective reduction of current and projected coastal climate risk (including reducing hazards locally and managing long-term exposure and vulnerability)?	5.1. Is there evidence of risk reduction today?	2	2	3	2	2	1	3	1	1	3	1	2	1	3	2	2	2	2	3	3	3	3	3	33
	5.2. Are there indications that the policies and actions implemented at the case study scale contribute to minimize the risk of maladaptation in the long run?	2	1	3	1	1	2	3	2	2	3	2	2.5	2	2	2	1	2	1.5	3	3	3	3	3	33
	5.3. Are there indications that the society (at the case study scale) is aware of the need to tackle both current and future coastal climate risks?	3	1	3	1	1	2	3	2	2	3	2	2.5	1	3	2	1	3	2	3	3	3	3	3	34
6. Is a pathway-like approach considered?	6.1. Are locally-relevant adaptation goals established in the short-, medium- and long-term (respectively <10 years, 1-3 decades, more), and articulated with each other (i.e. how does reaching present-day goals support reaching longer-term ones)?	2	2	3	2	2	2	3	2	2	2	2	2	2	1	1.5	3	3	3	2	3	2.5	2	2	34
	6.2. Are synergies and trade-offs (now and over time) between various adaptation-related options considered?	2	1	0	1	1	2	3	2	2	2	3	2.5	1	1	1	2	3	2.5	3	3	3	3	3	30
	6.3. Are options planned in a sequenced manner and alternative strategies at the case study level?	2	2	0	1	1	2	3	2	2	2	3	2.5	1	1	1	2	3	2.5	3	2	2.5	3	3	30
Median aggregated confidence levels		2	2	3	1	2	2	3	3	3	3	3	2	2	2	2	2	3	3	3	3	3	3	3
Aggregated scores	Per local case study		40	44	28		42	56	42		46	38		33	42		44	51		43	55		52		656
	Per region		112				140				84			75			95			98			52
	Archetype 2	544

[truncated: 6 more sheets: 5c. Assessment archetype A3 (, 5d. Assessment archetype A4 (, 6a. Case study per aggregated, 6b. Case study aggregated sco, 6c. Case study aggregated sco, 6d. Assessment Adaptation GAP]
